# Supplementary material for: Upregulation of KLK8 contributes to CUMS-induced hippocampal neuronal apoptosis by cleaving NCAM1
Source: PubMed Central journal article supplement (PMC10115824; doi:10.1038/s41419-023-05800-5), 2023-04-19

# Figure.1E

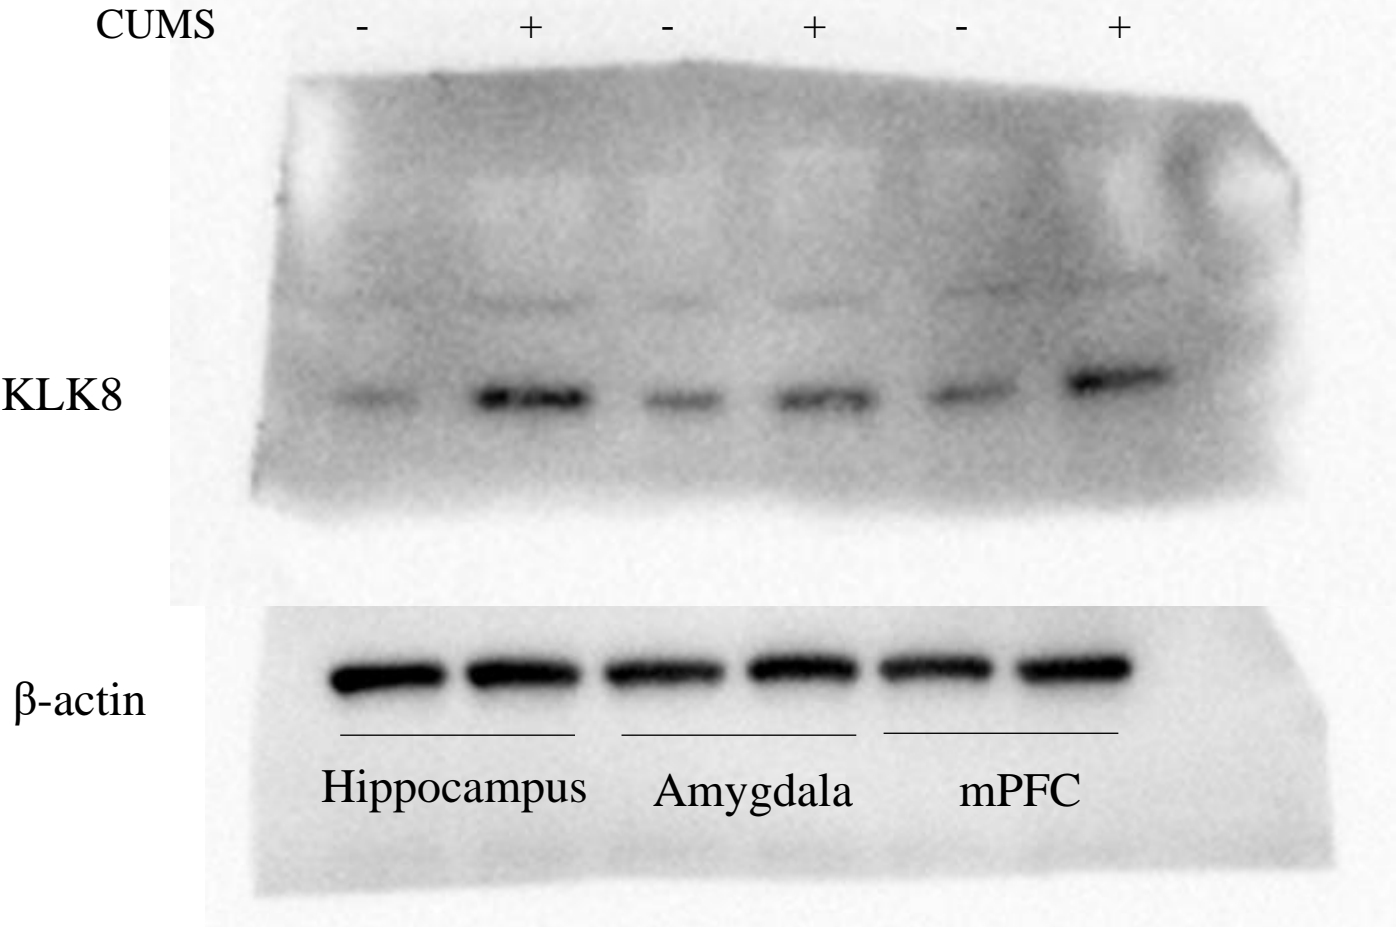

# Figure.2A

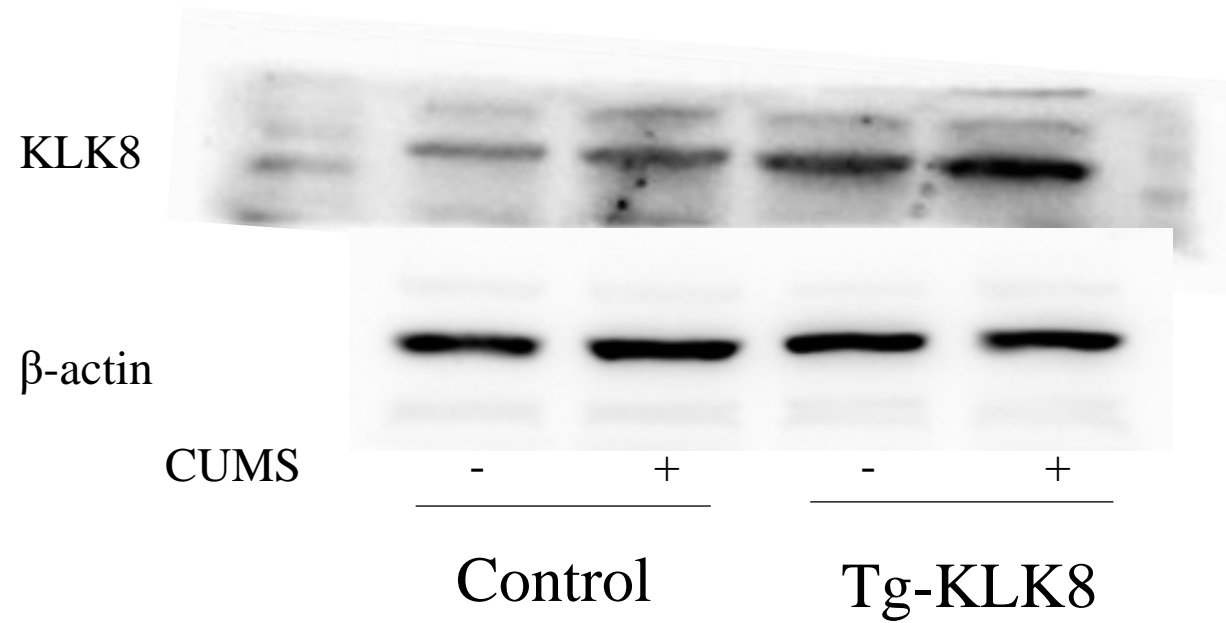

# Figure.2E

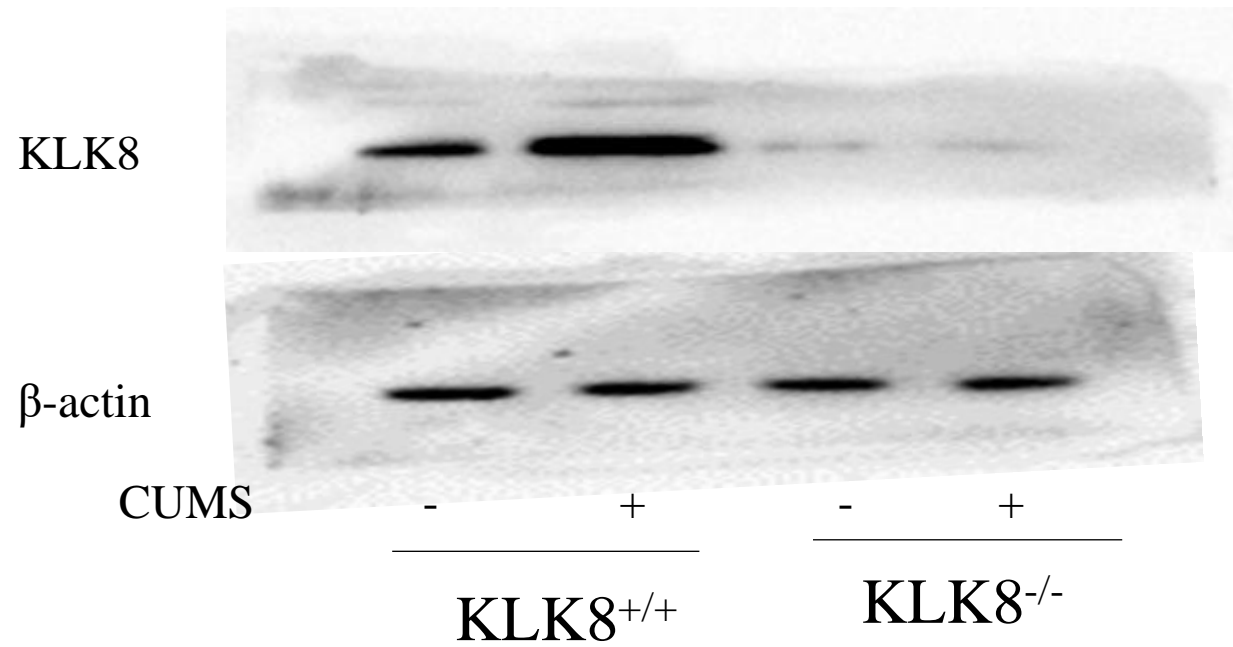

# Figure.3A

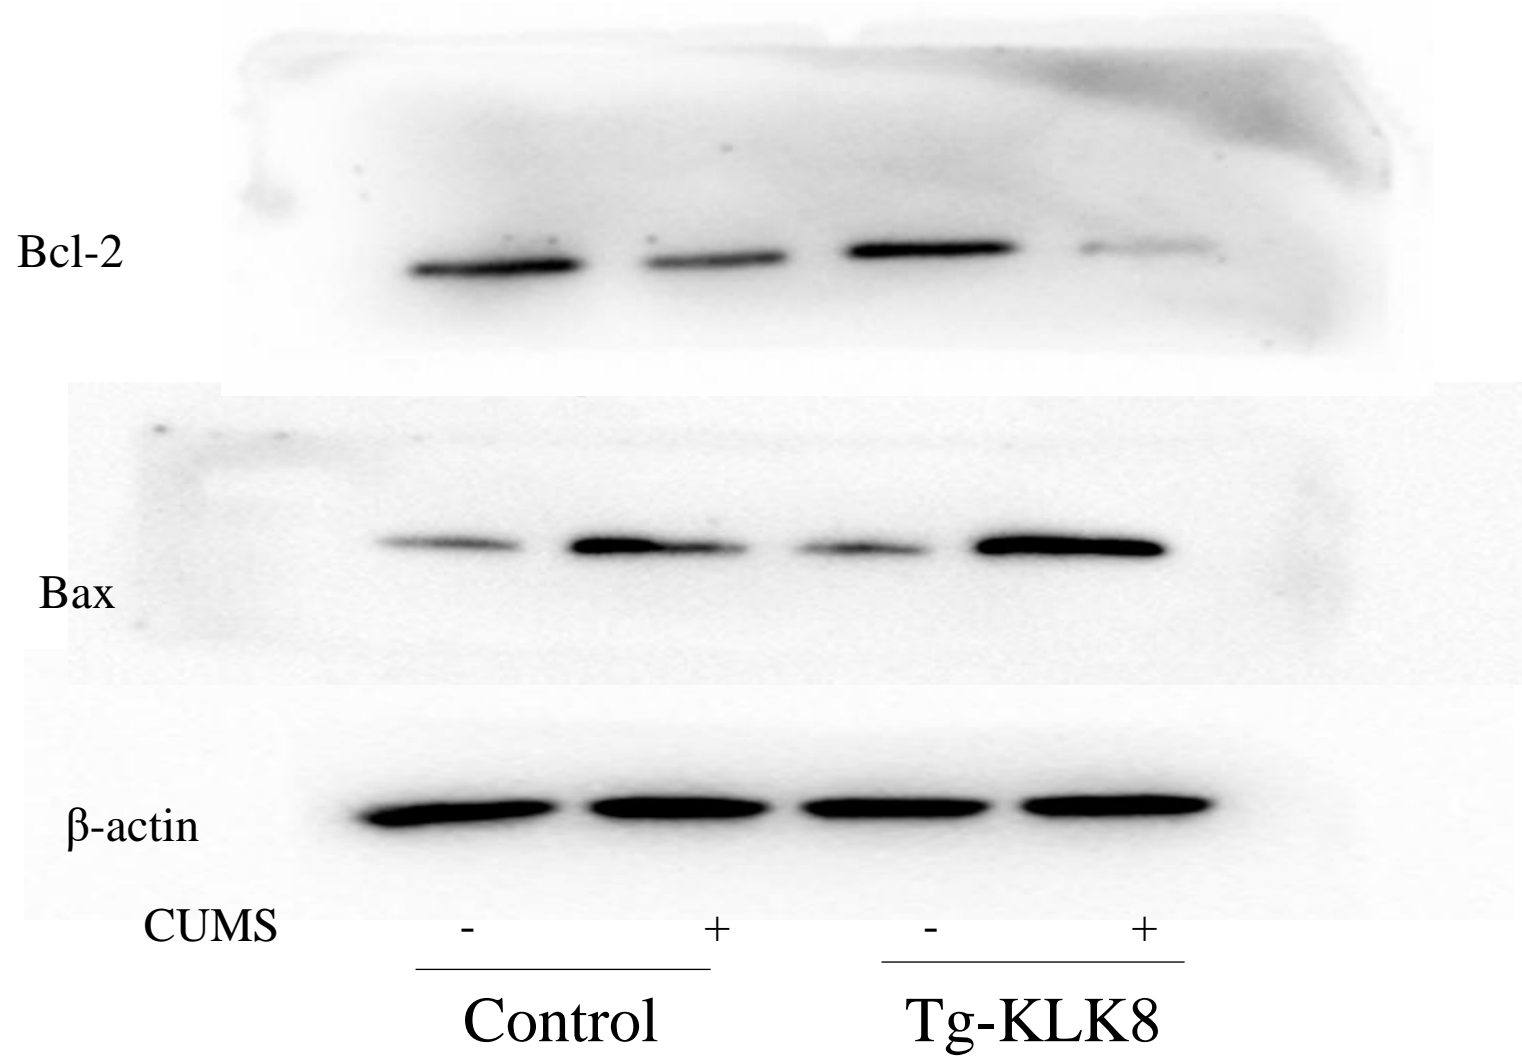

# Figure.3D

Bcl-2

Bax

$\beta$ -actin

CUMS

KLK8<sup>+/+</sup>

KLK8<sup>-/-</sup>

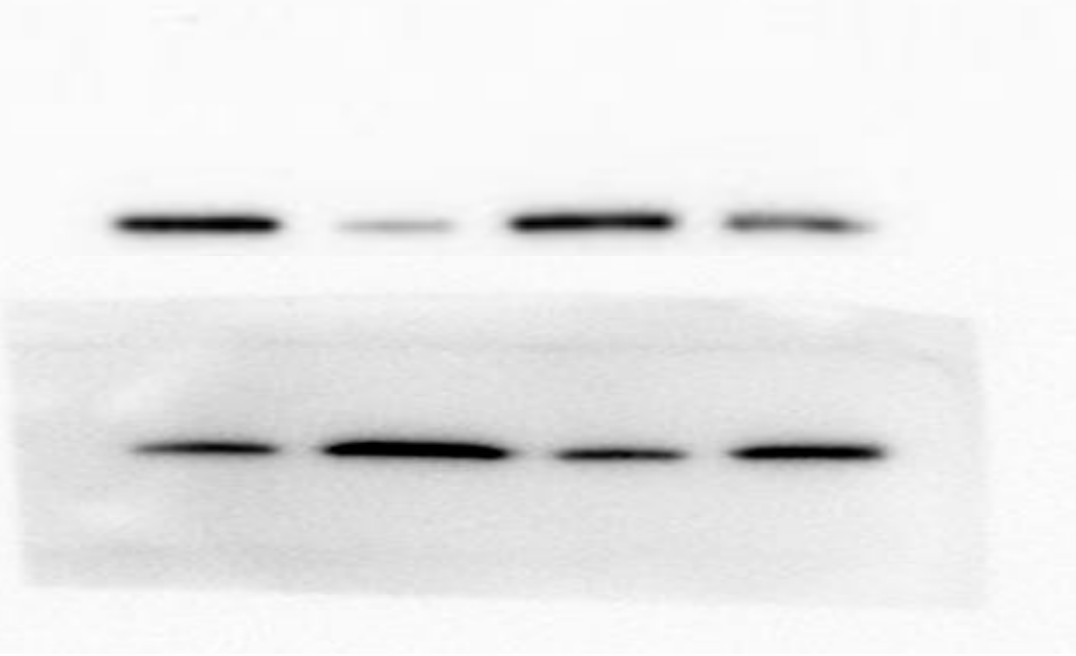

# Figure.4A

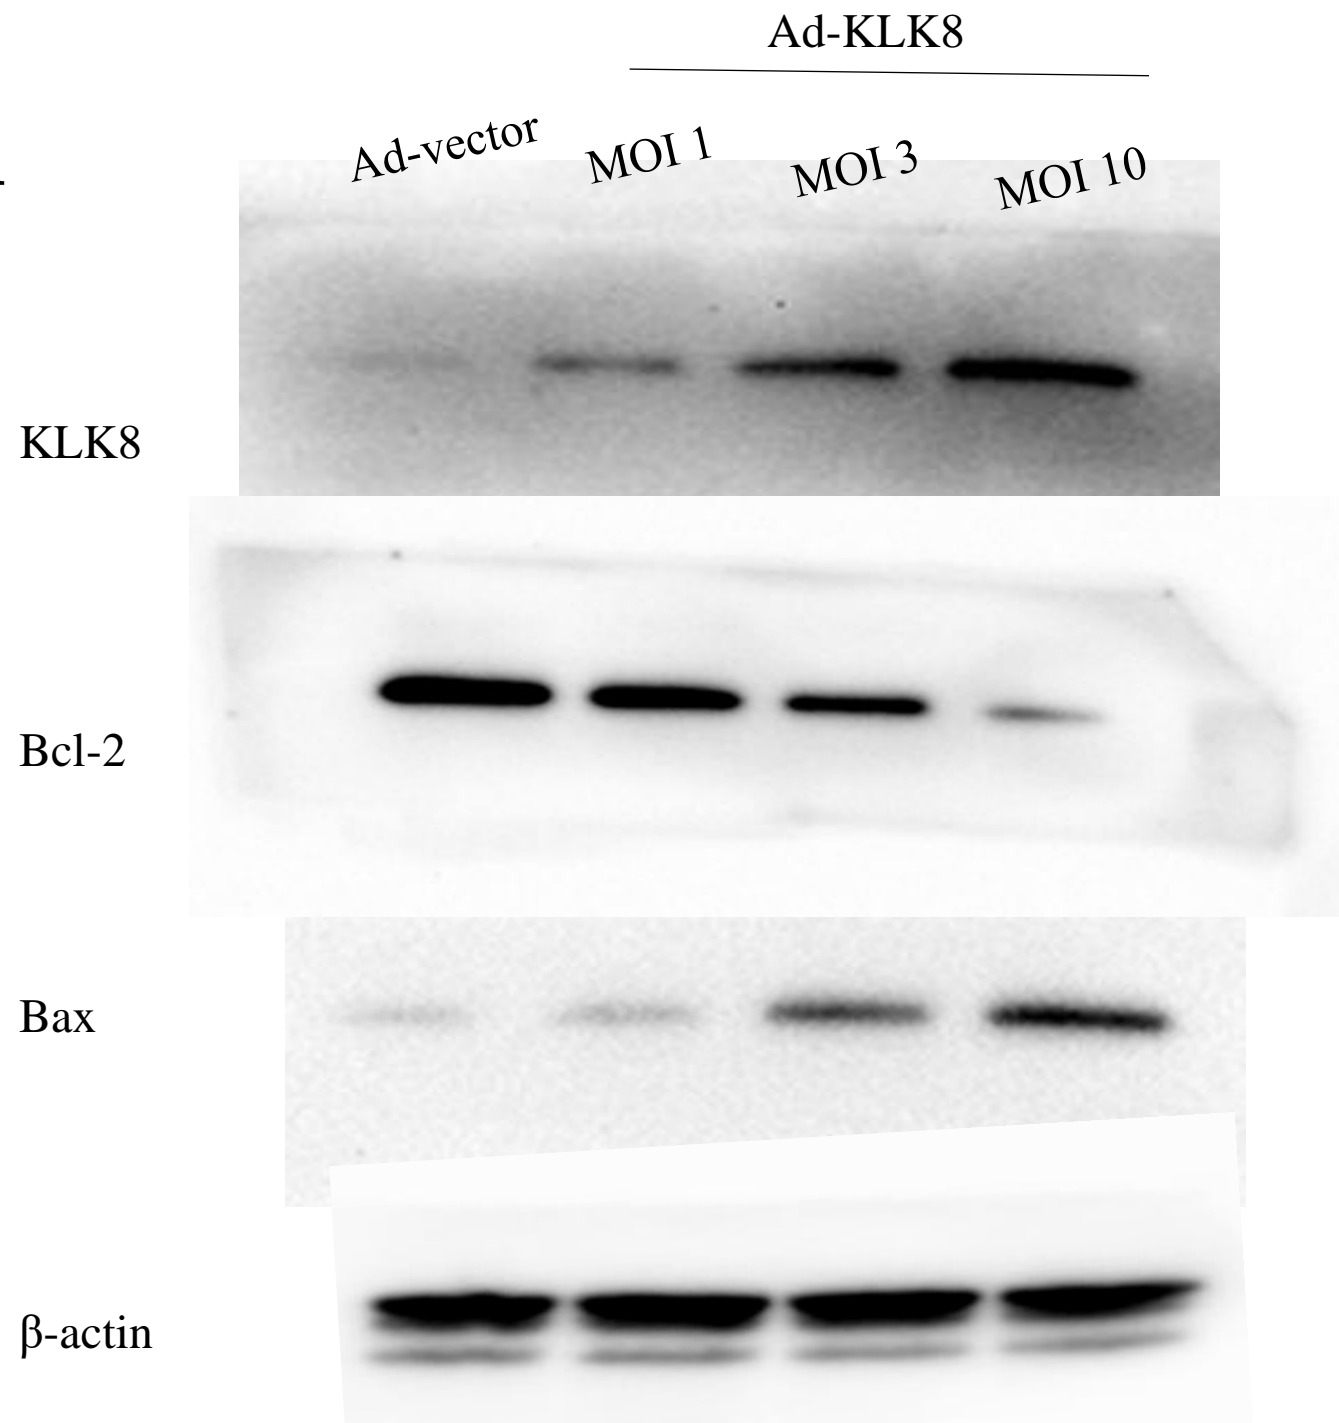

# Figure.4E

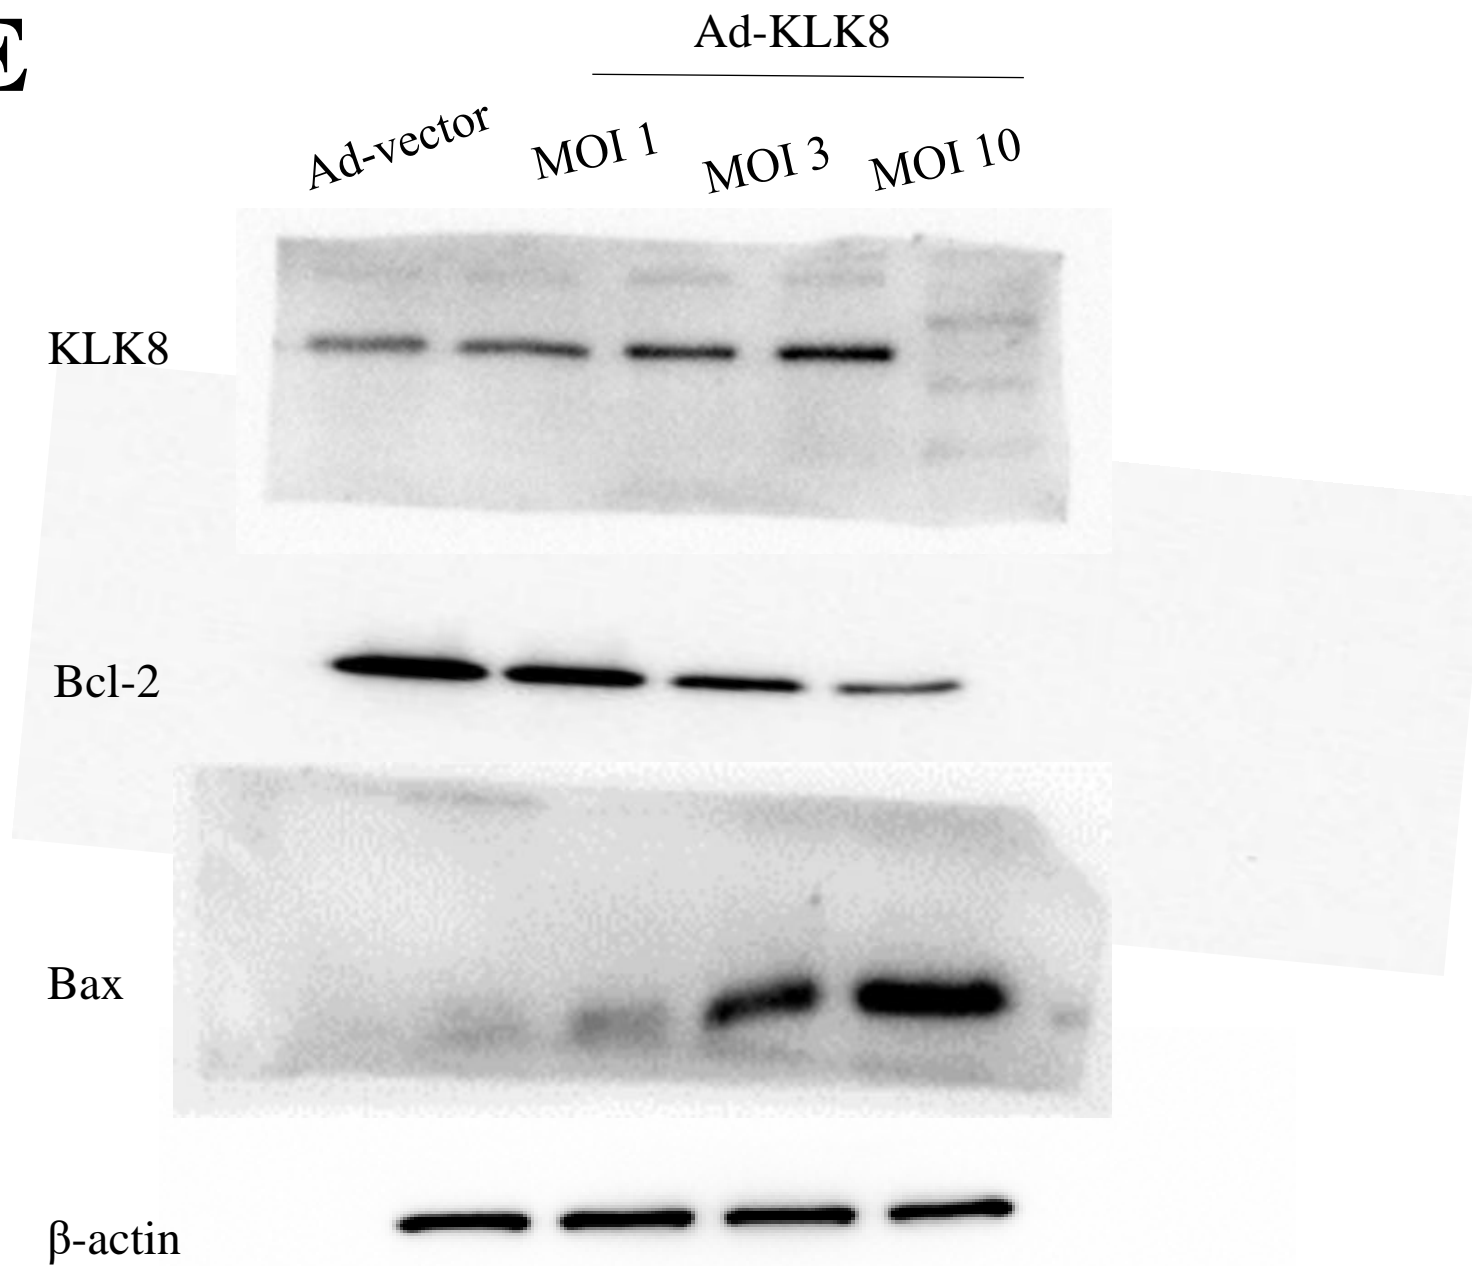

# Figure.5C

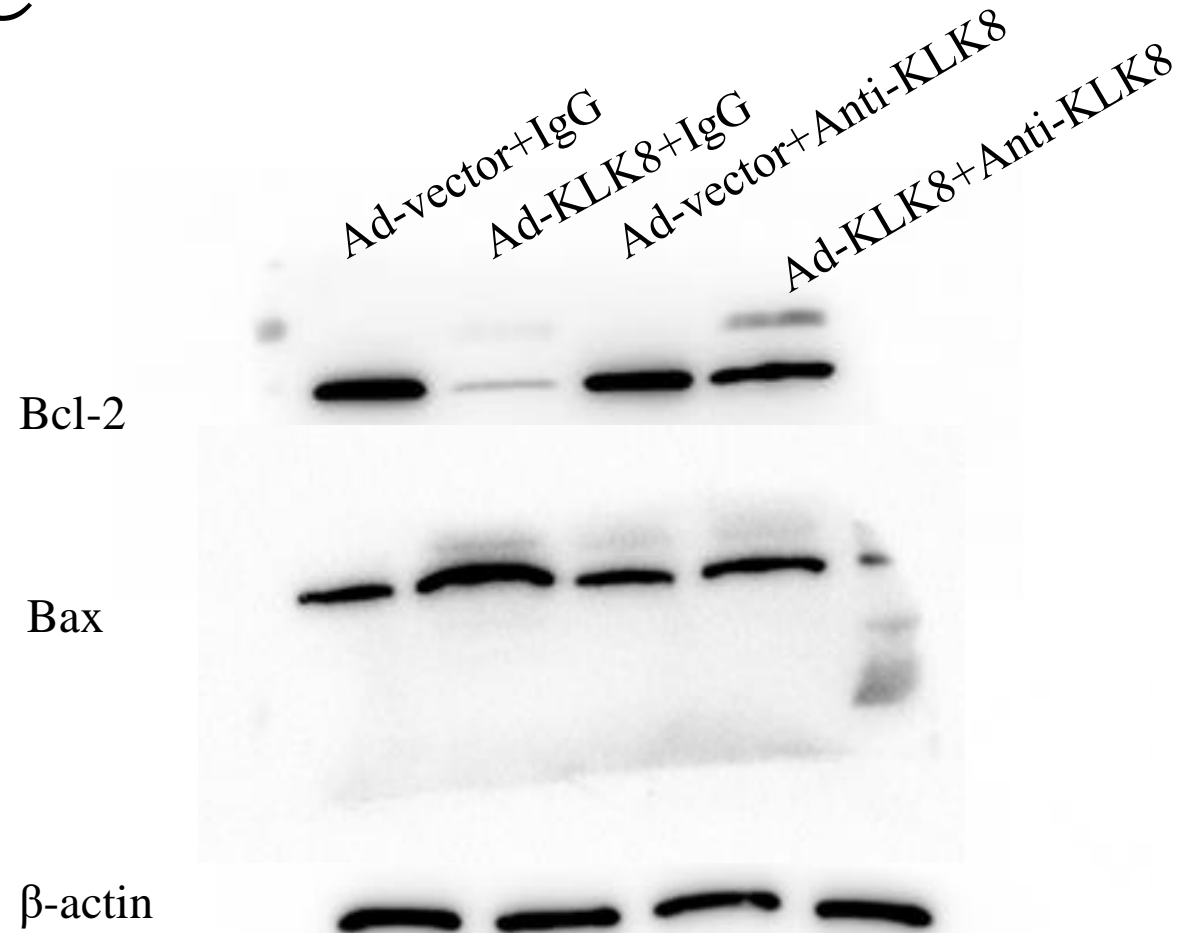



# Figure.6A

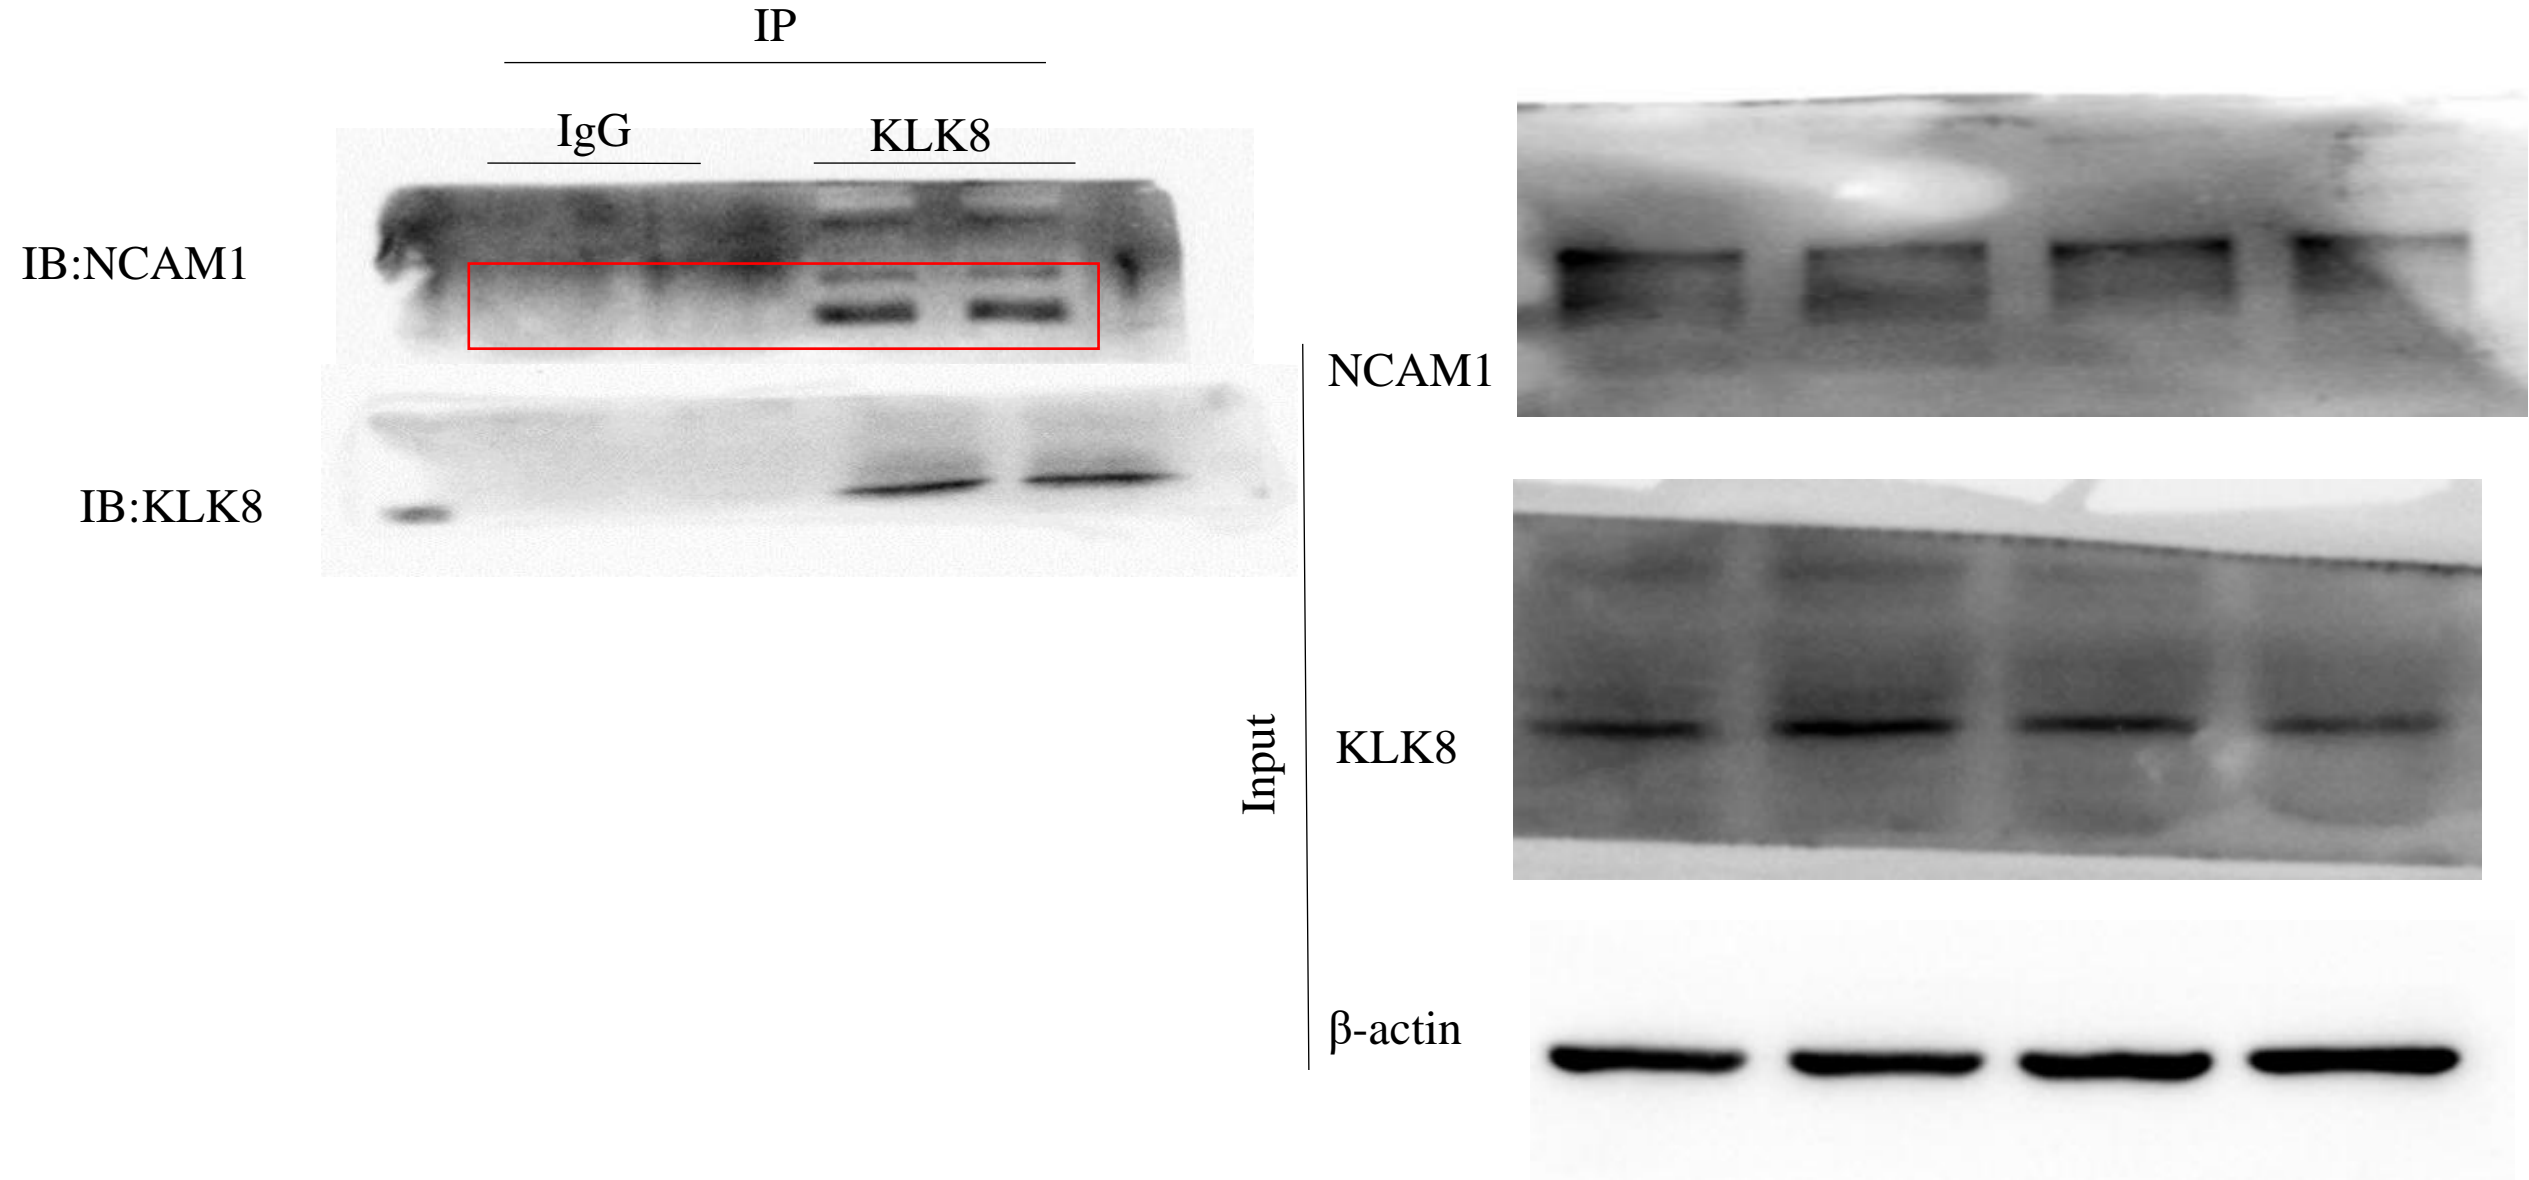

HT22

# Figure.6A

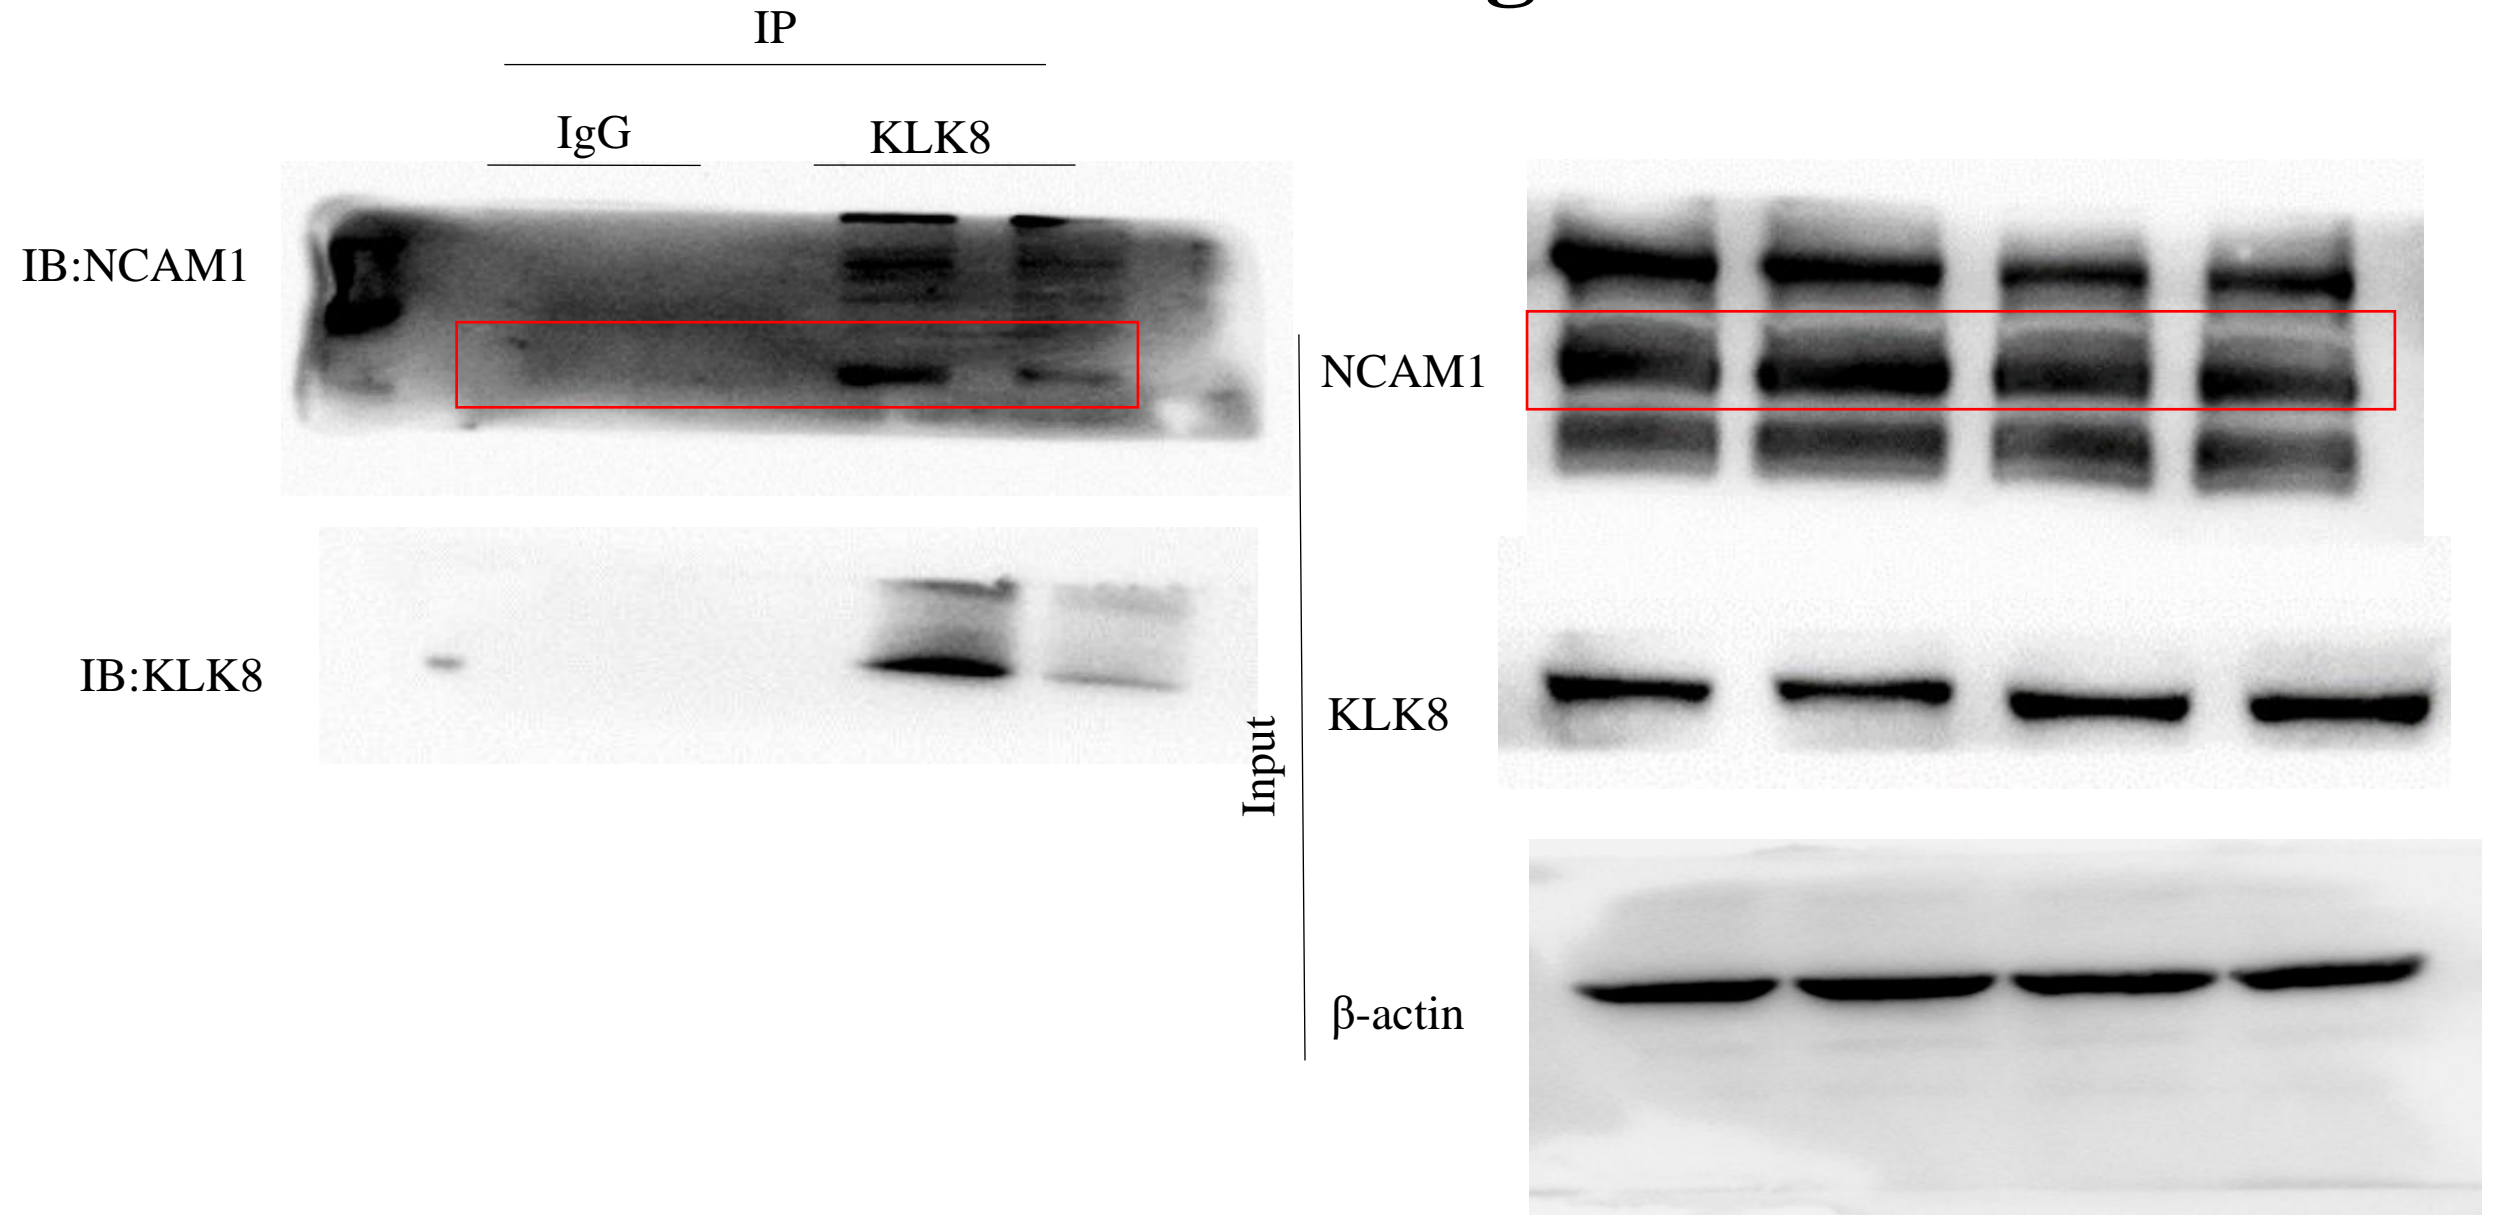

Hippocampus

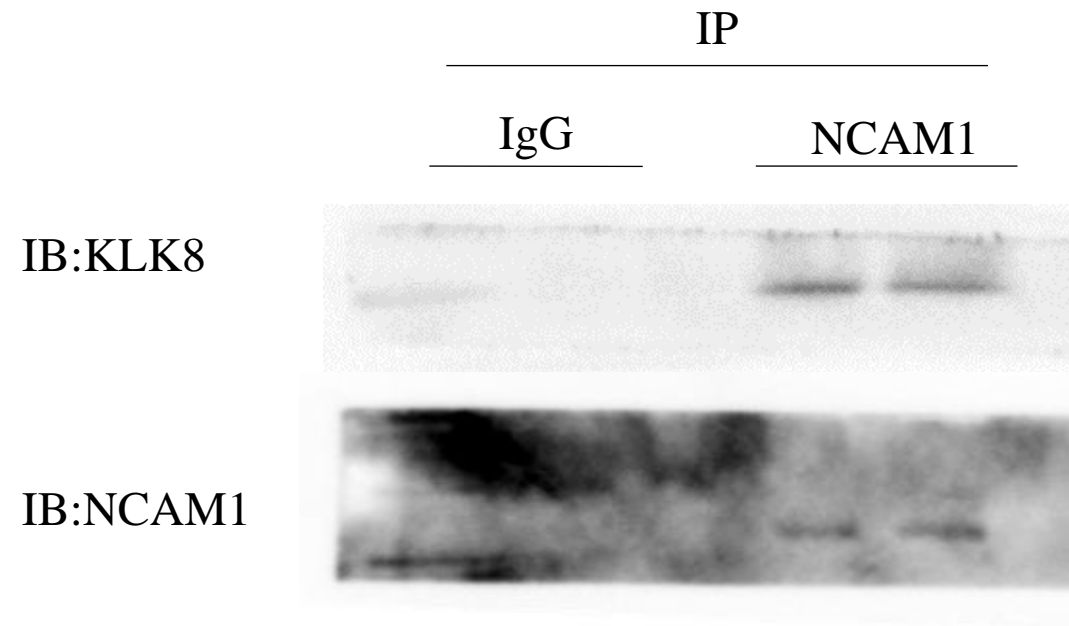

# Figure.6A

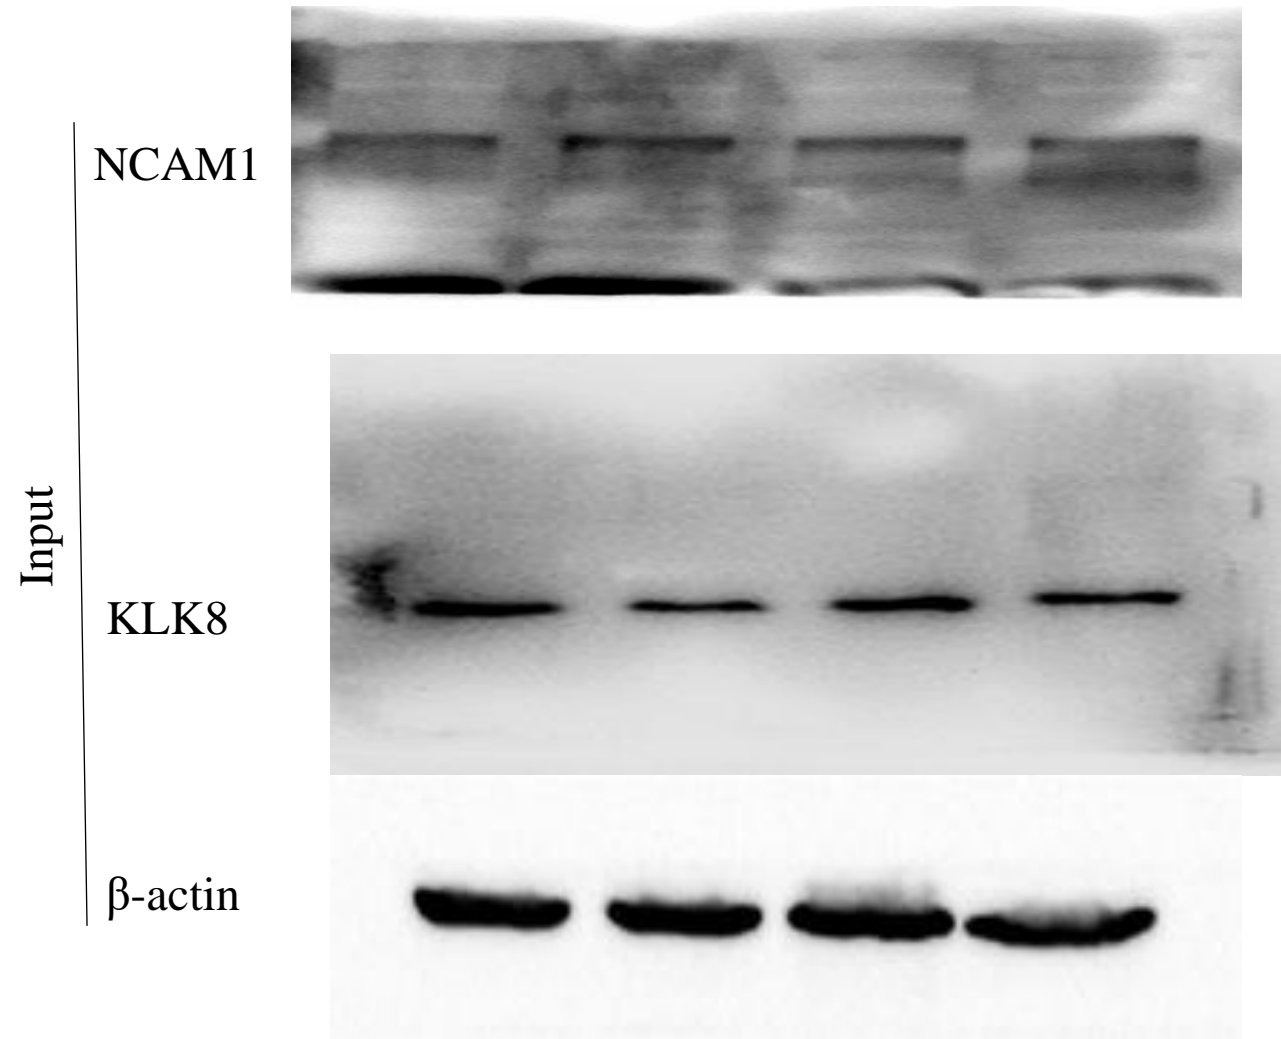

# Figure.6A

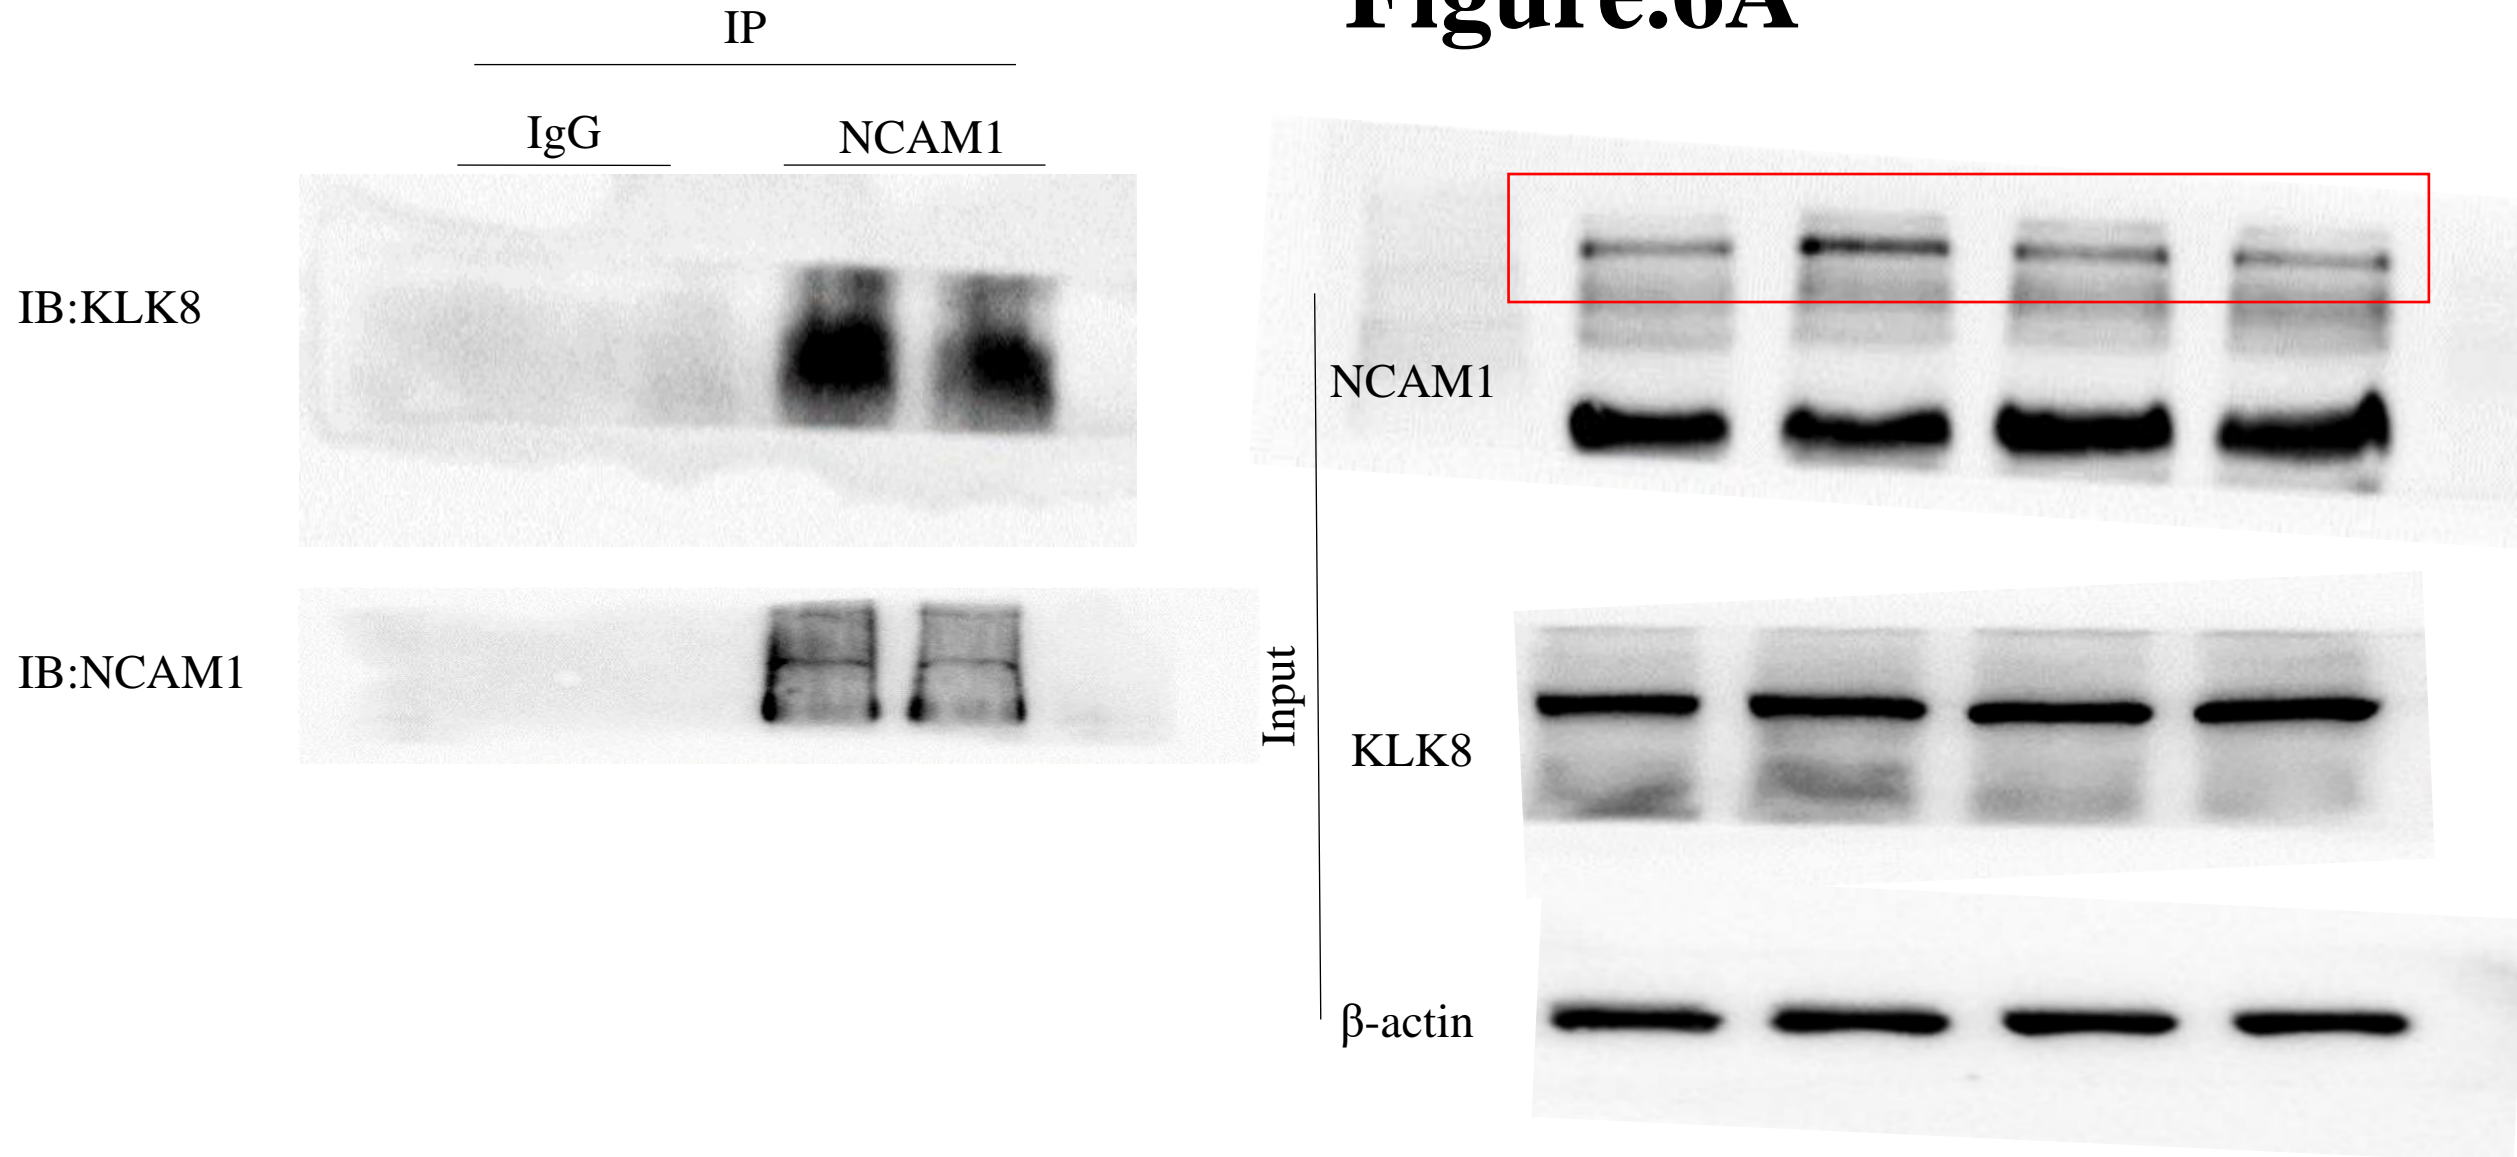

# Figure.6D

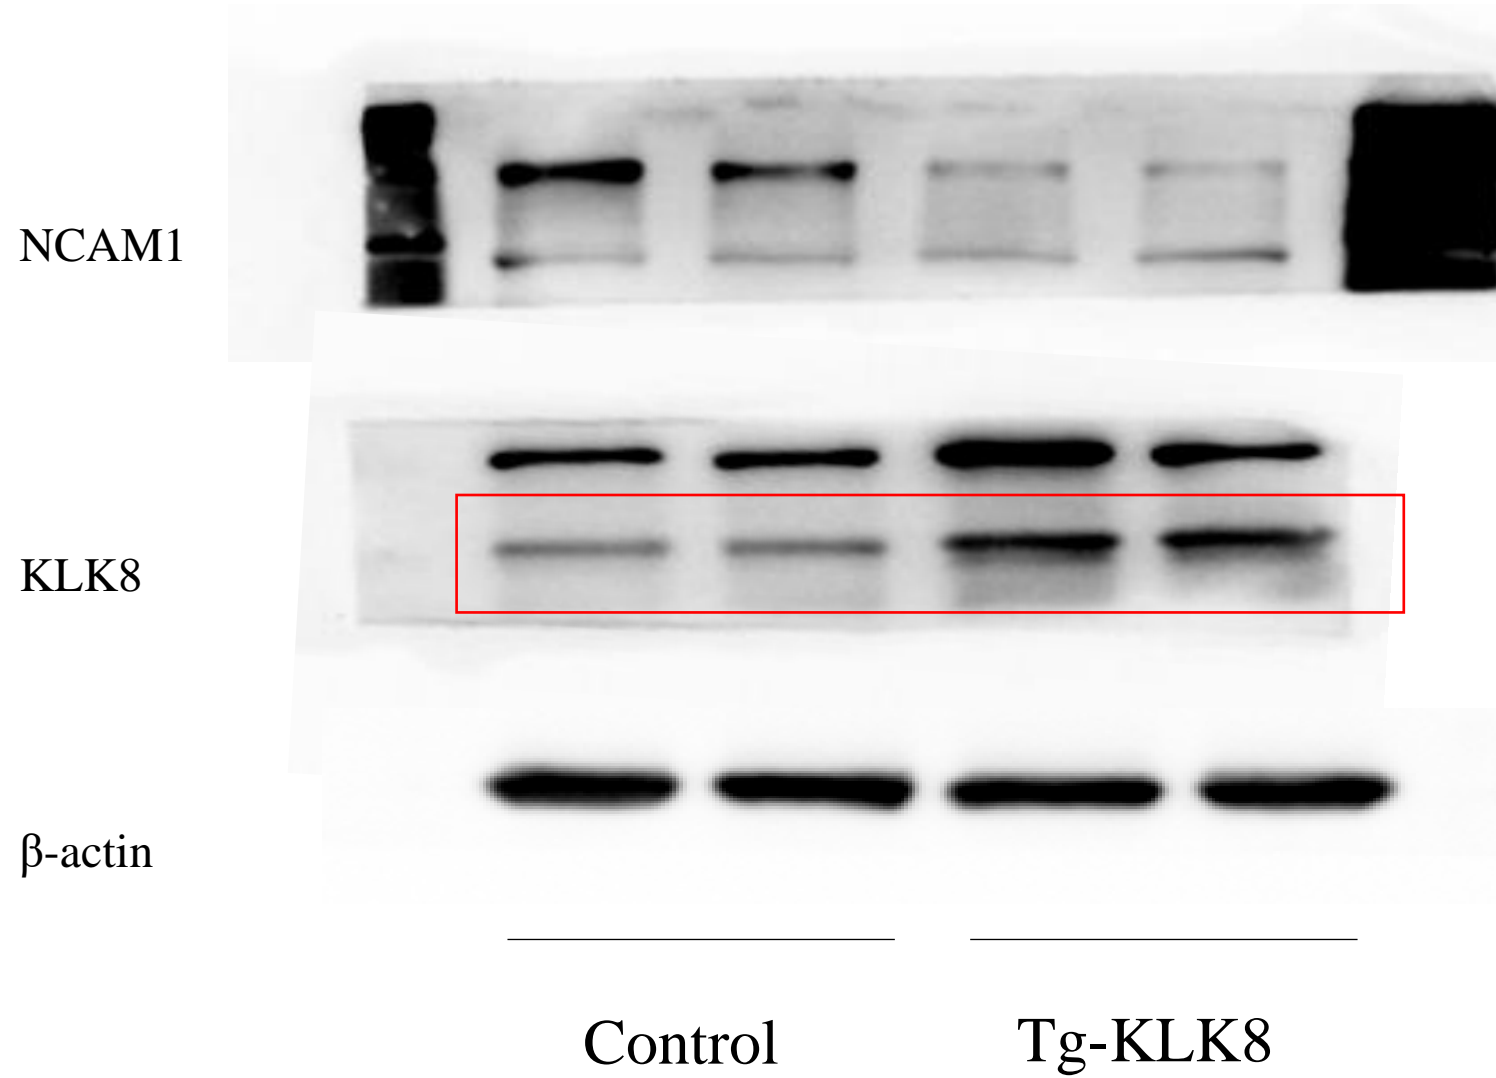

# Figure.6E

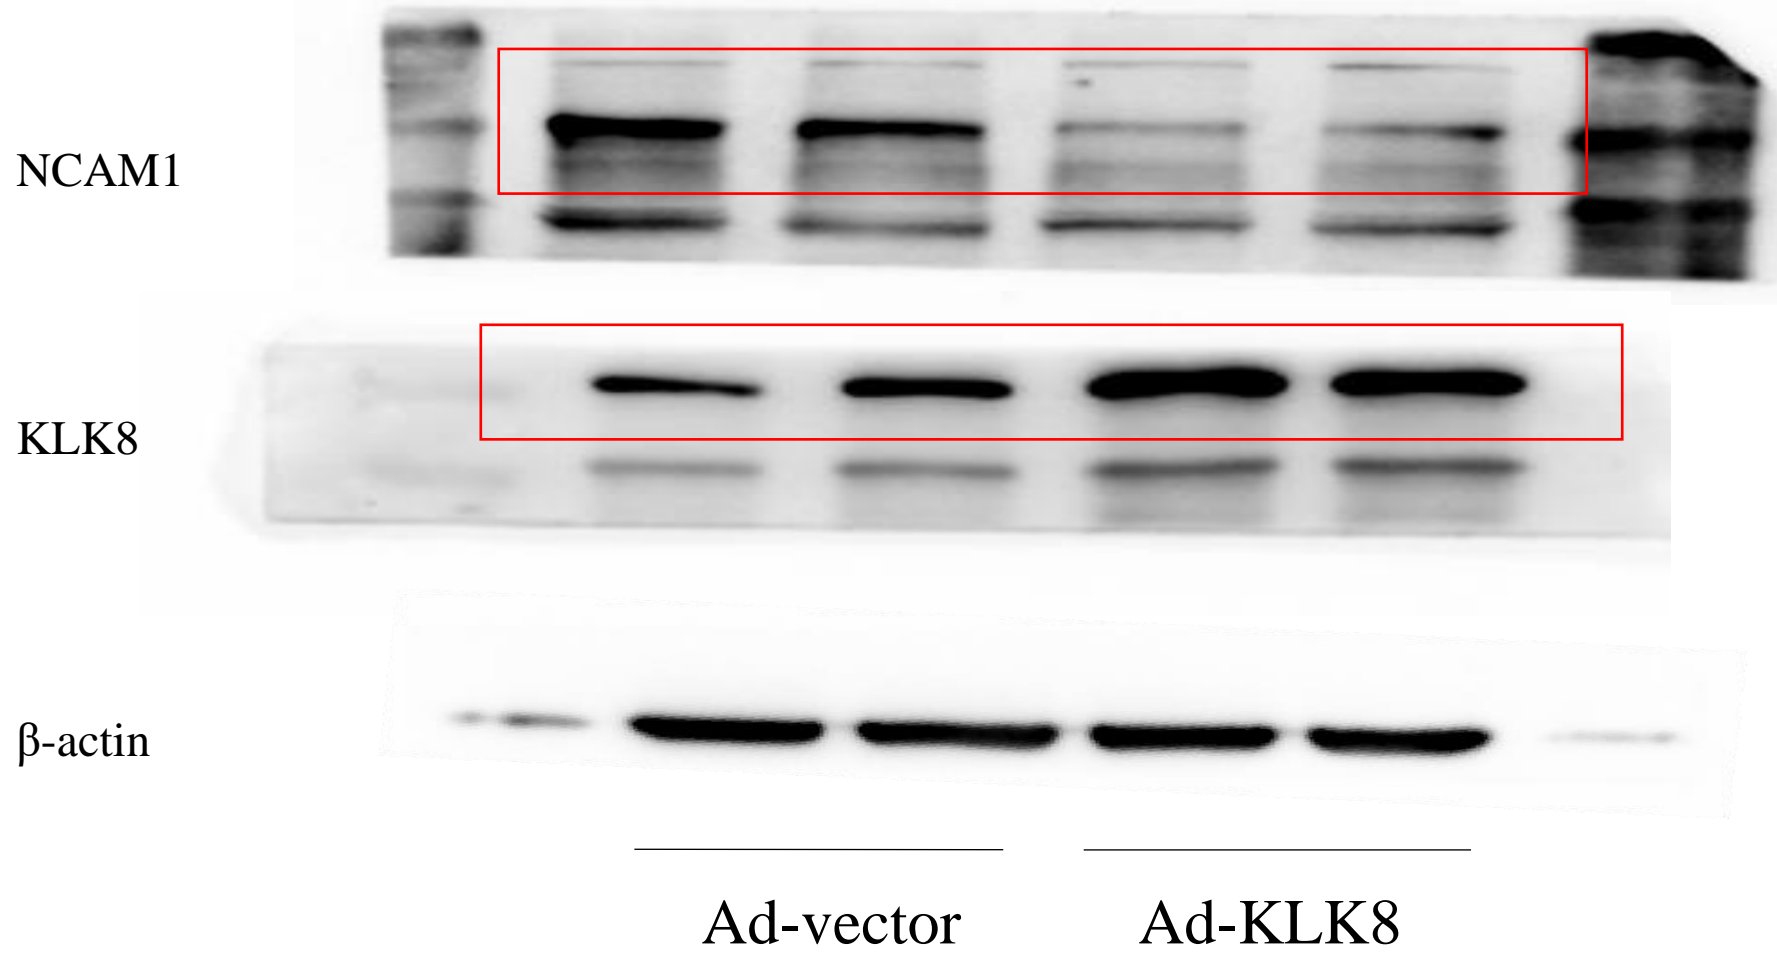

Medium

# Figure.6F

Ad-vector      Ad-KLK8

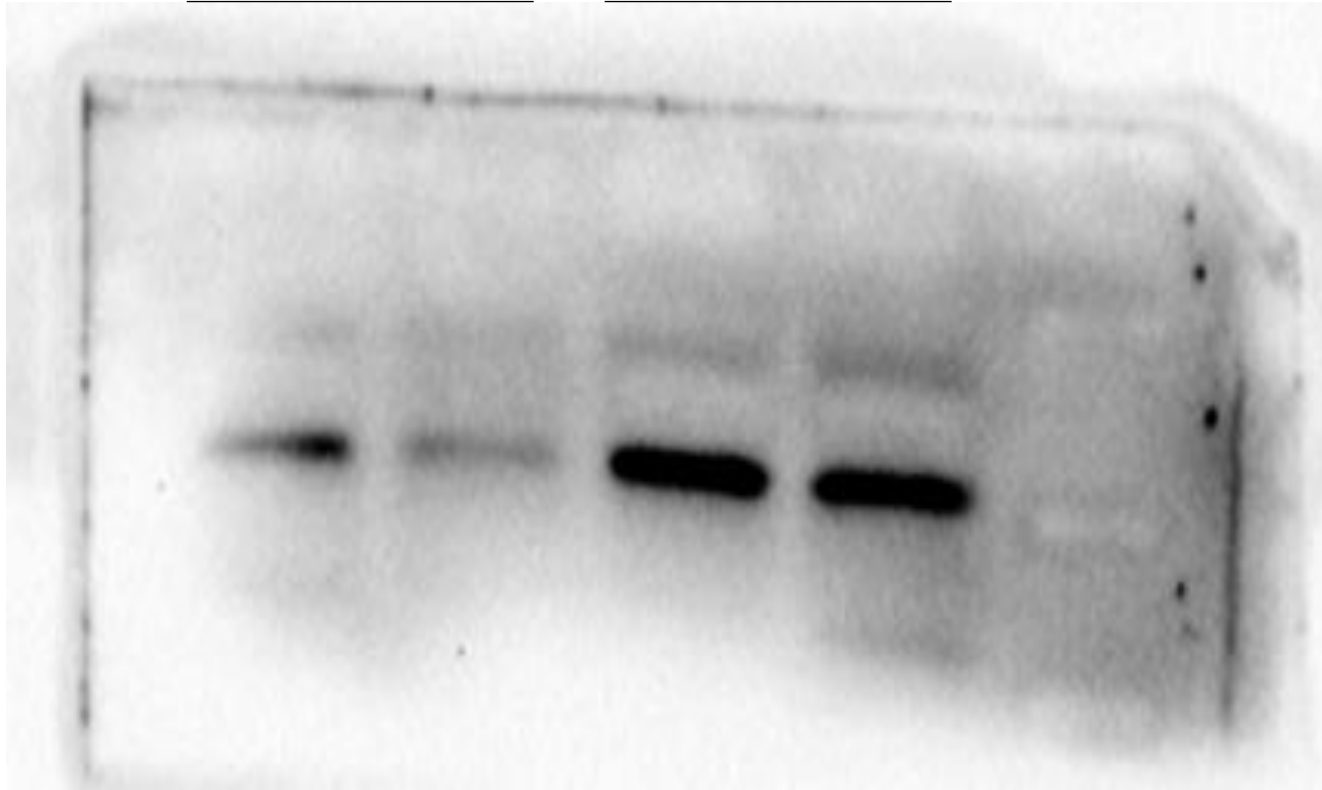

Ad-vector

Ad-KLK8

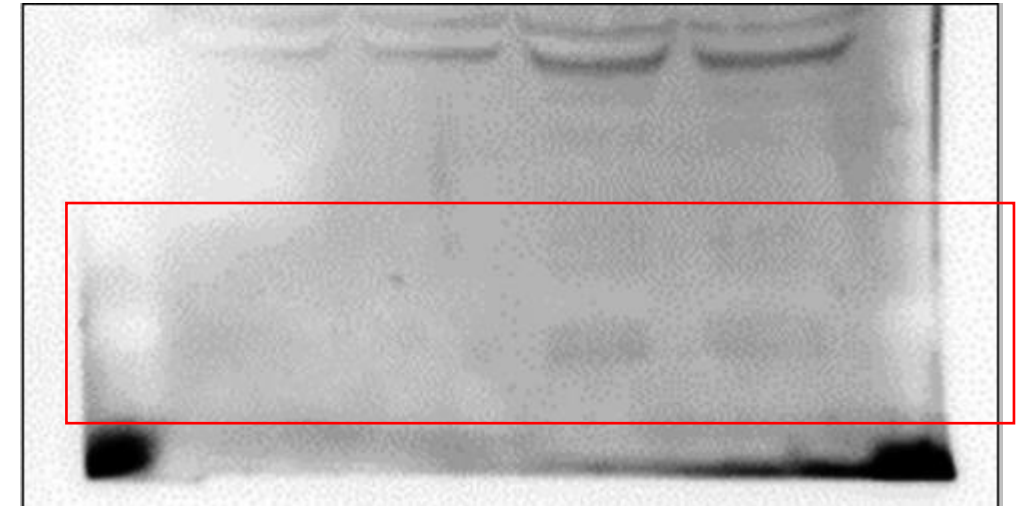

**Figure.6F**

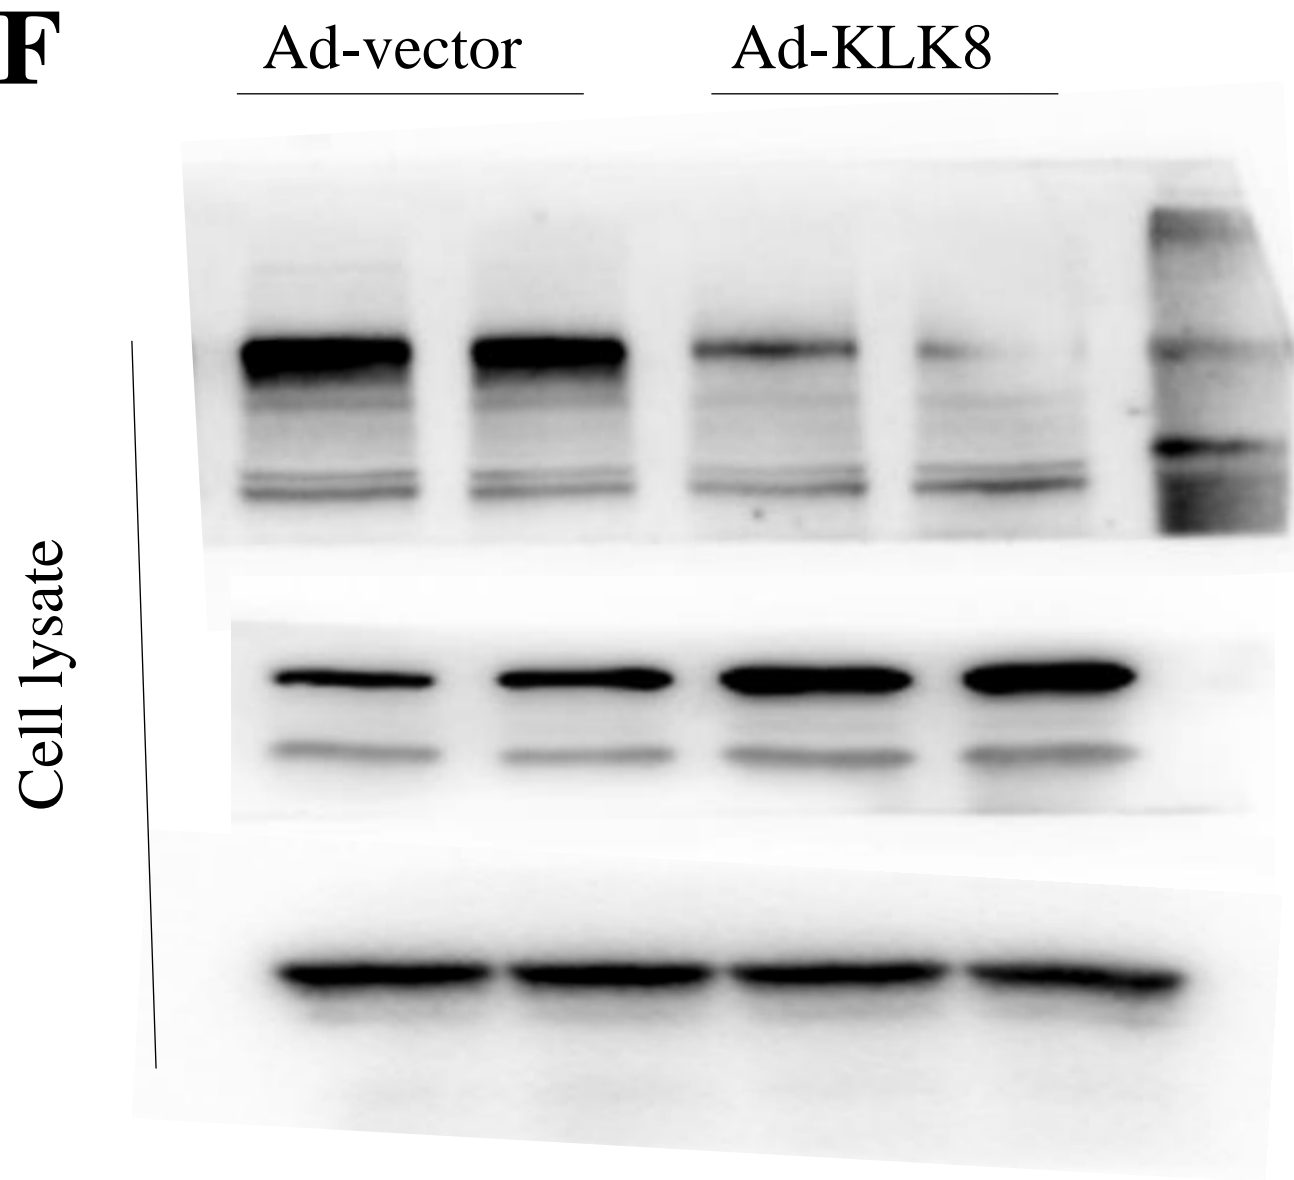



# Figure.7C

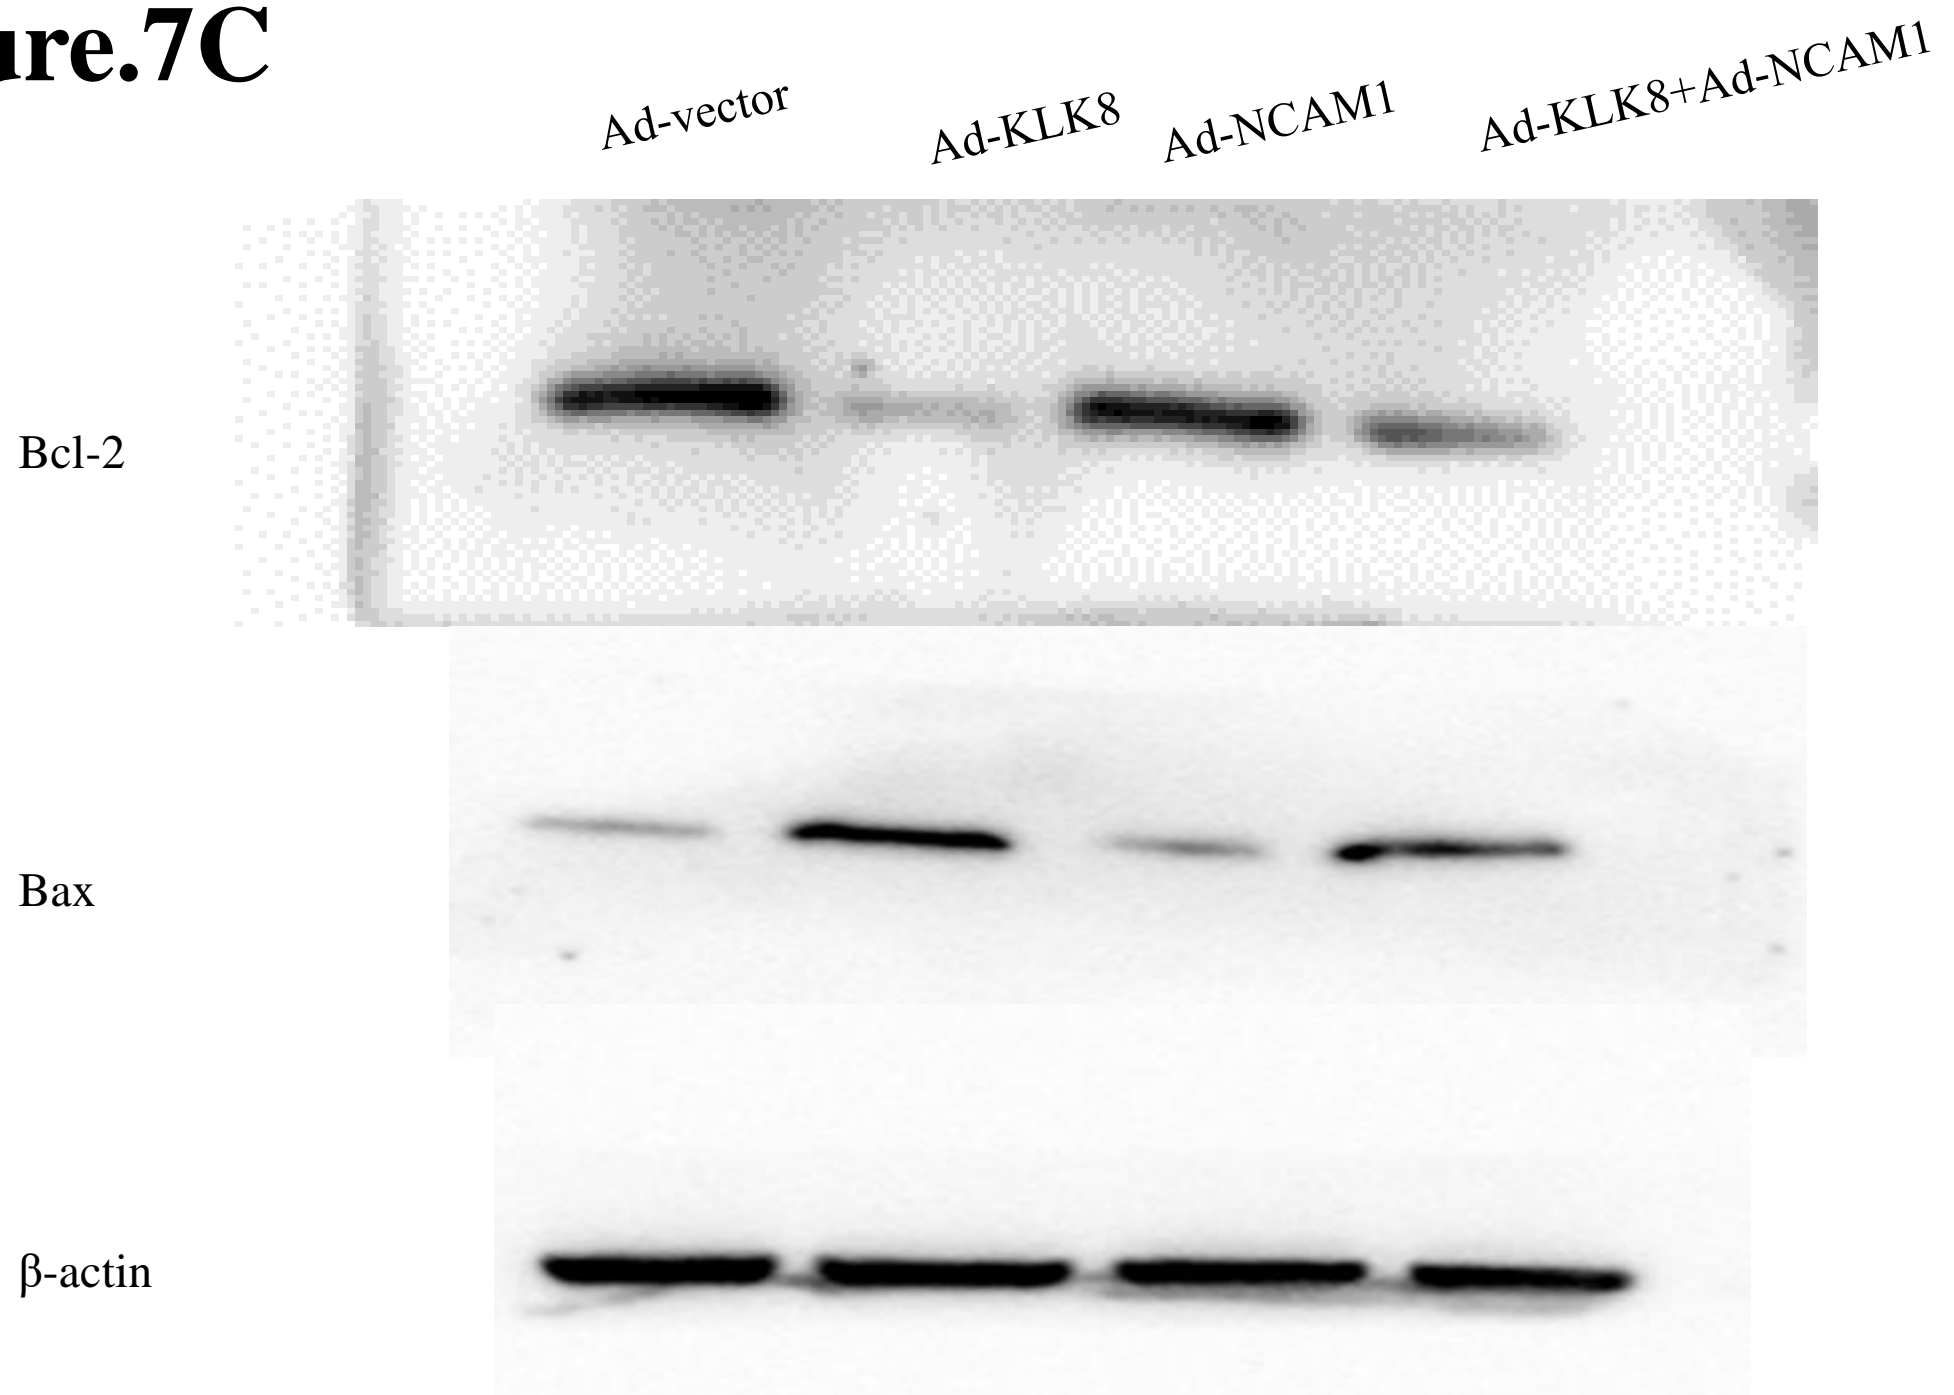

# Figure.7G

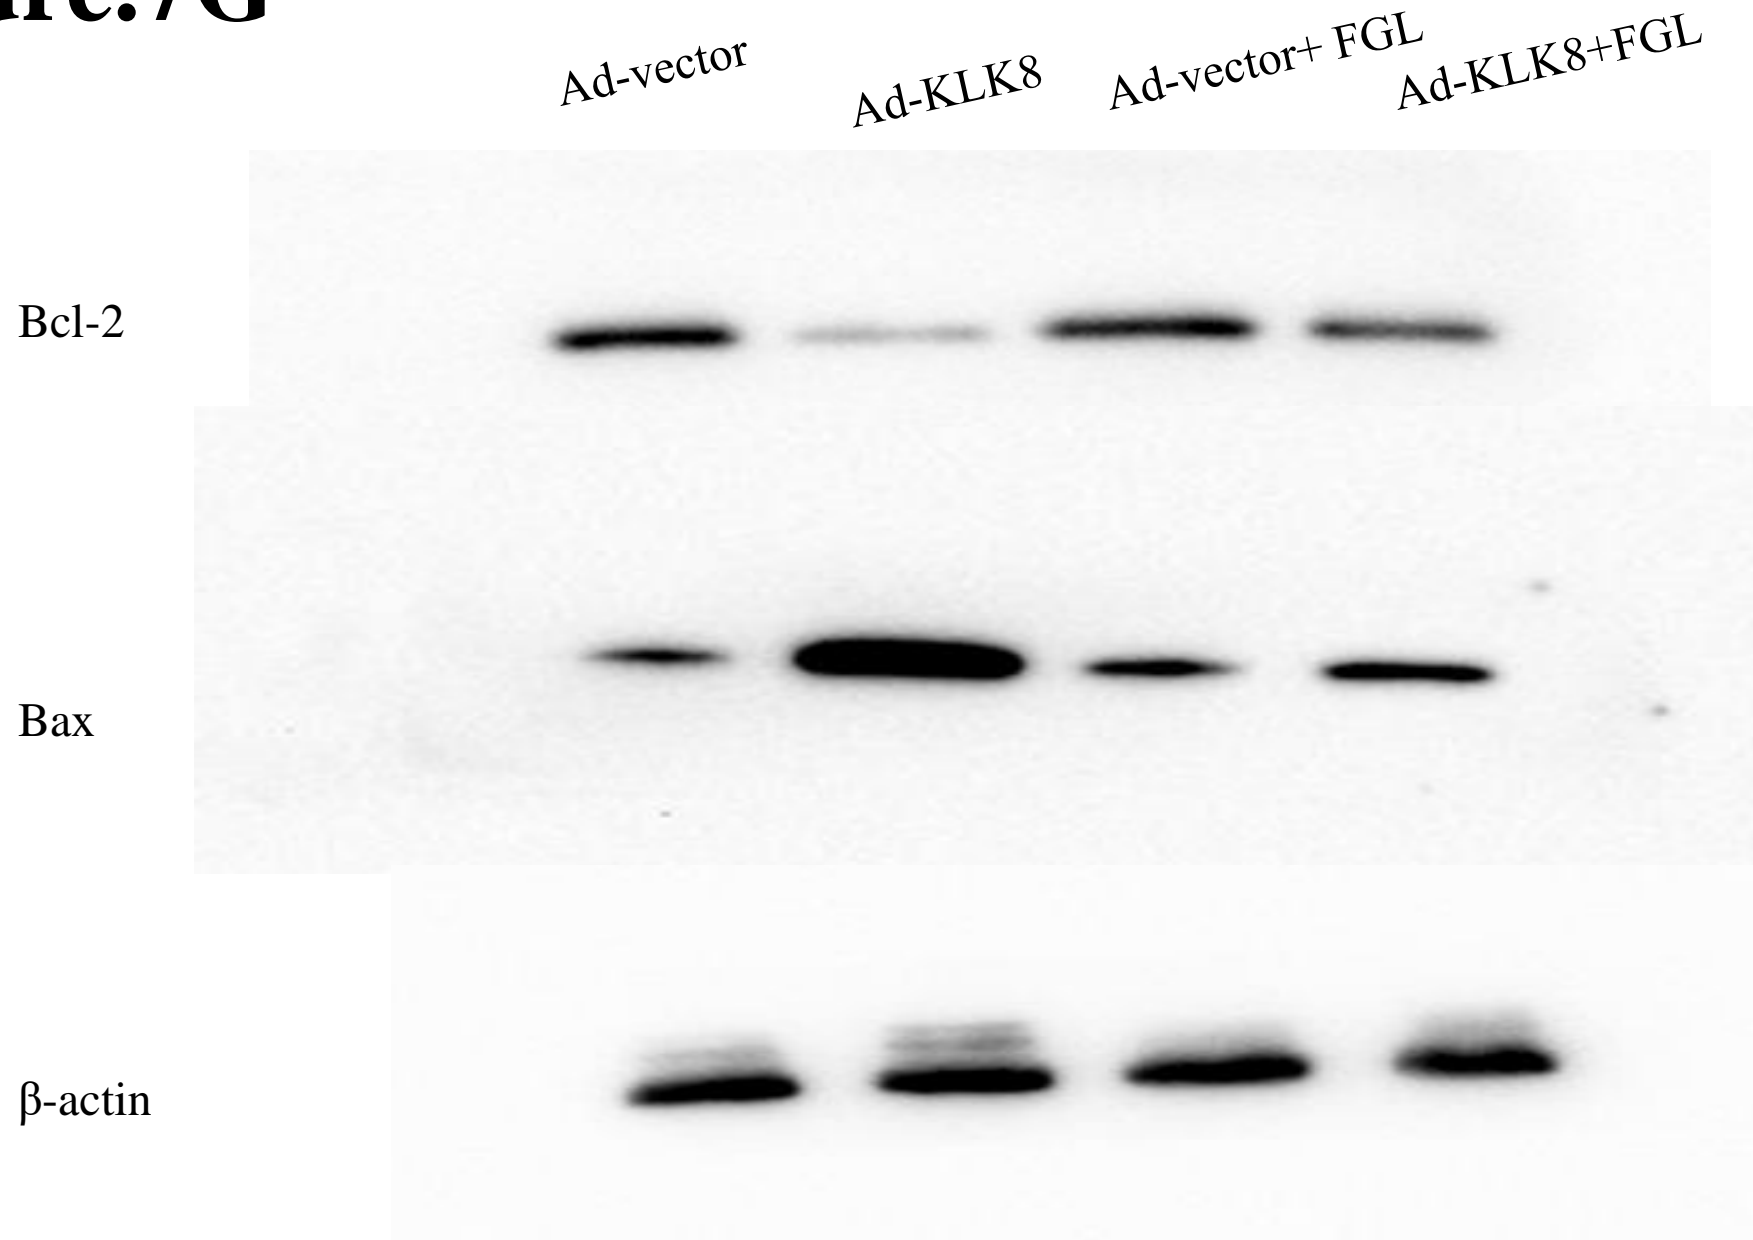

# Figure.8C

Bcl-2

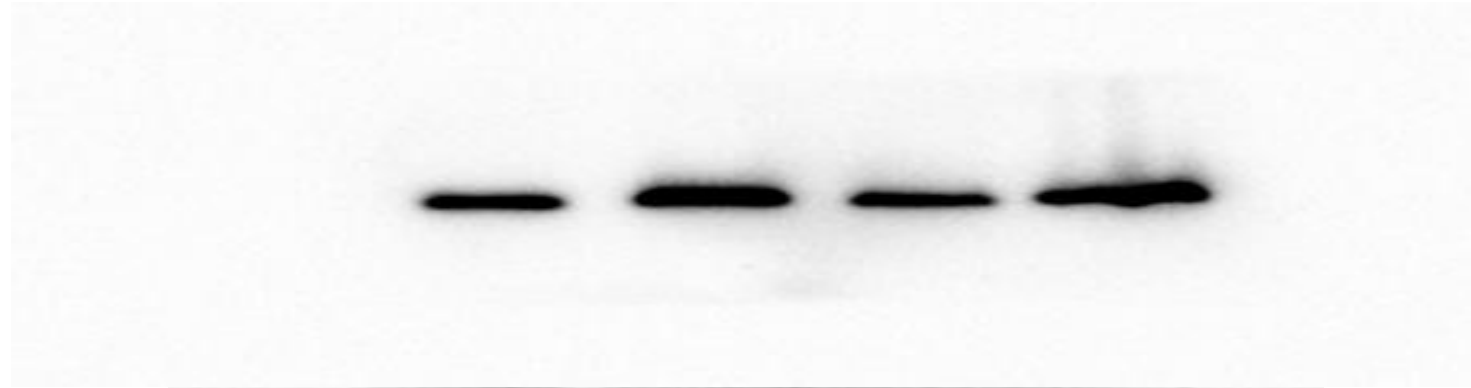

Bax

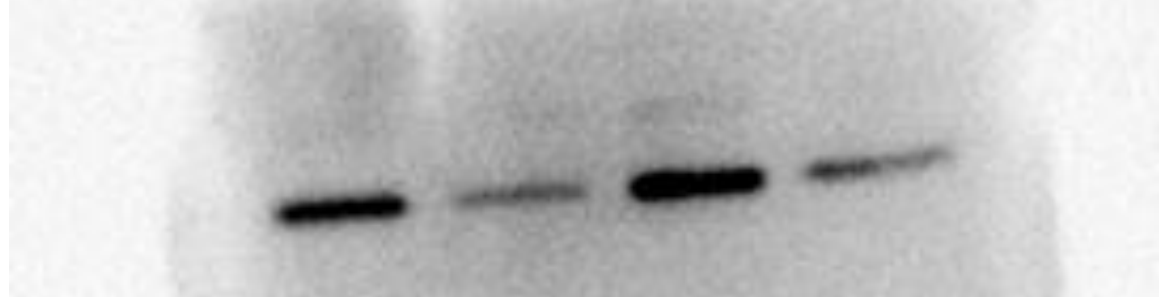

$\beta$ -actin

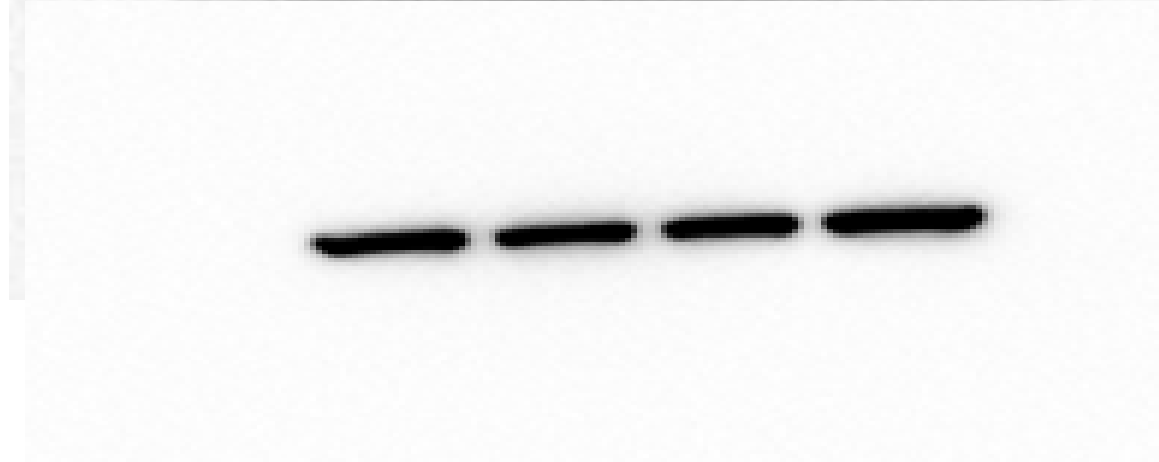

Ad-KLK8+Ad-vector

Ad-KLK8+Ad-NCAM1

Ad-KLK8+vehicle

Ad-KLK8+FGL

# Supplemental Fig. S1A

Bcl-2

Bax

$\beta$ -actin

CUMS

-

+

-

+

KLK8<sup>+/+</sup>

KLK8<sup>-/-</sup>

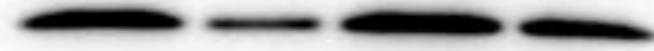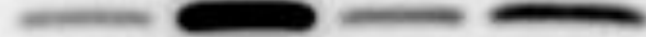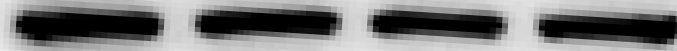

# Supplemental Fig. S2A

Bcl-2

Bax

$\beta$ -actin

CUMS

|                     |   |                     |   |
|---------------------|---|---------------------|---|
| -                   | + | -                   | + |
| KLK8 <sup>+/+</sup> |   | KLK8 <sup>-/-</sup> |   |

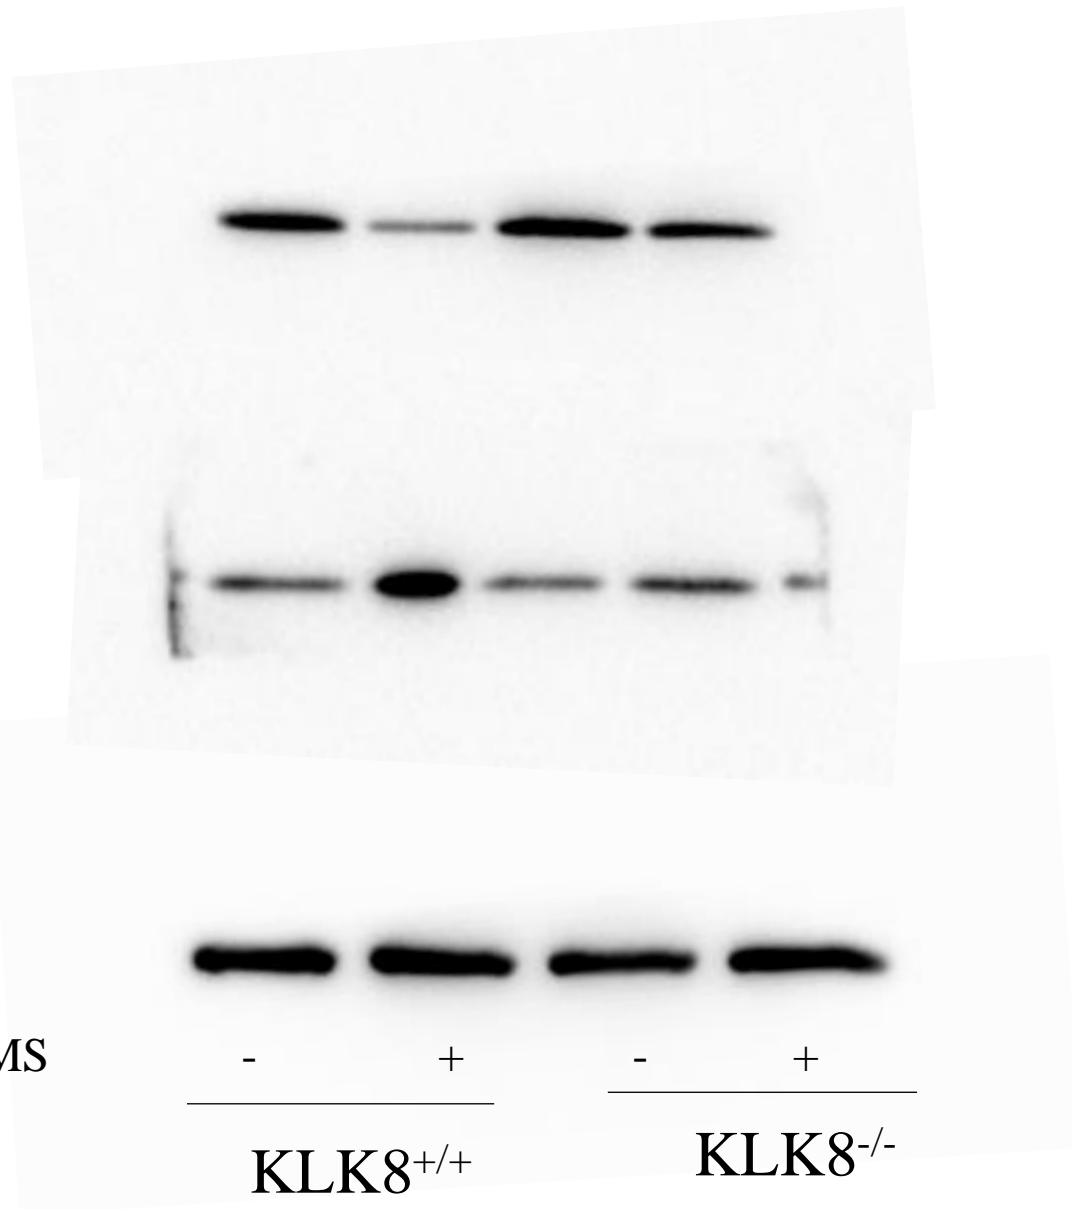

# Supplemental Fig. S4C

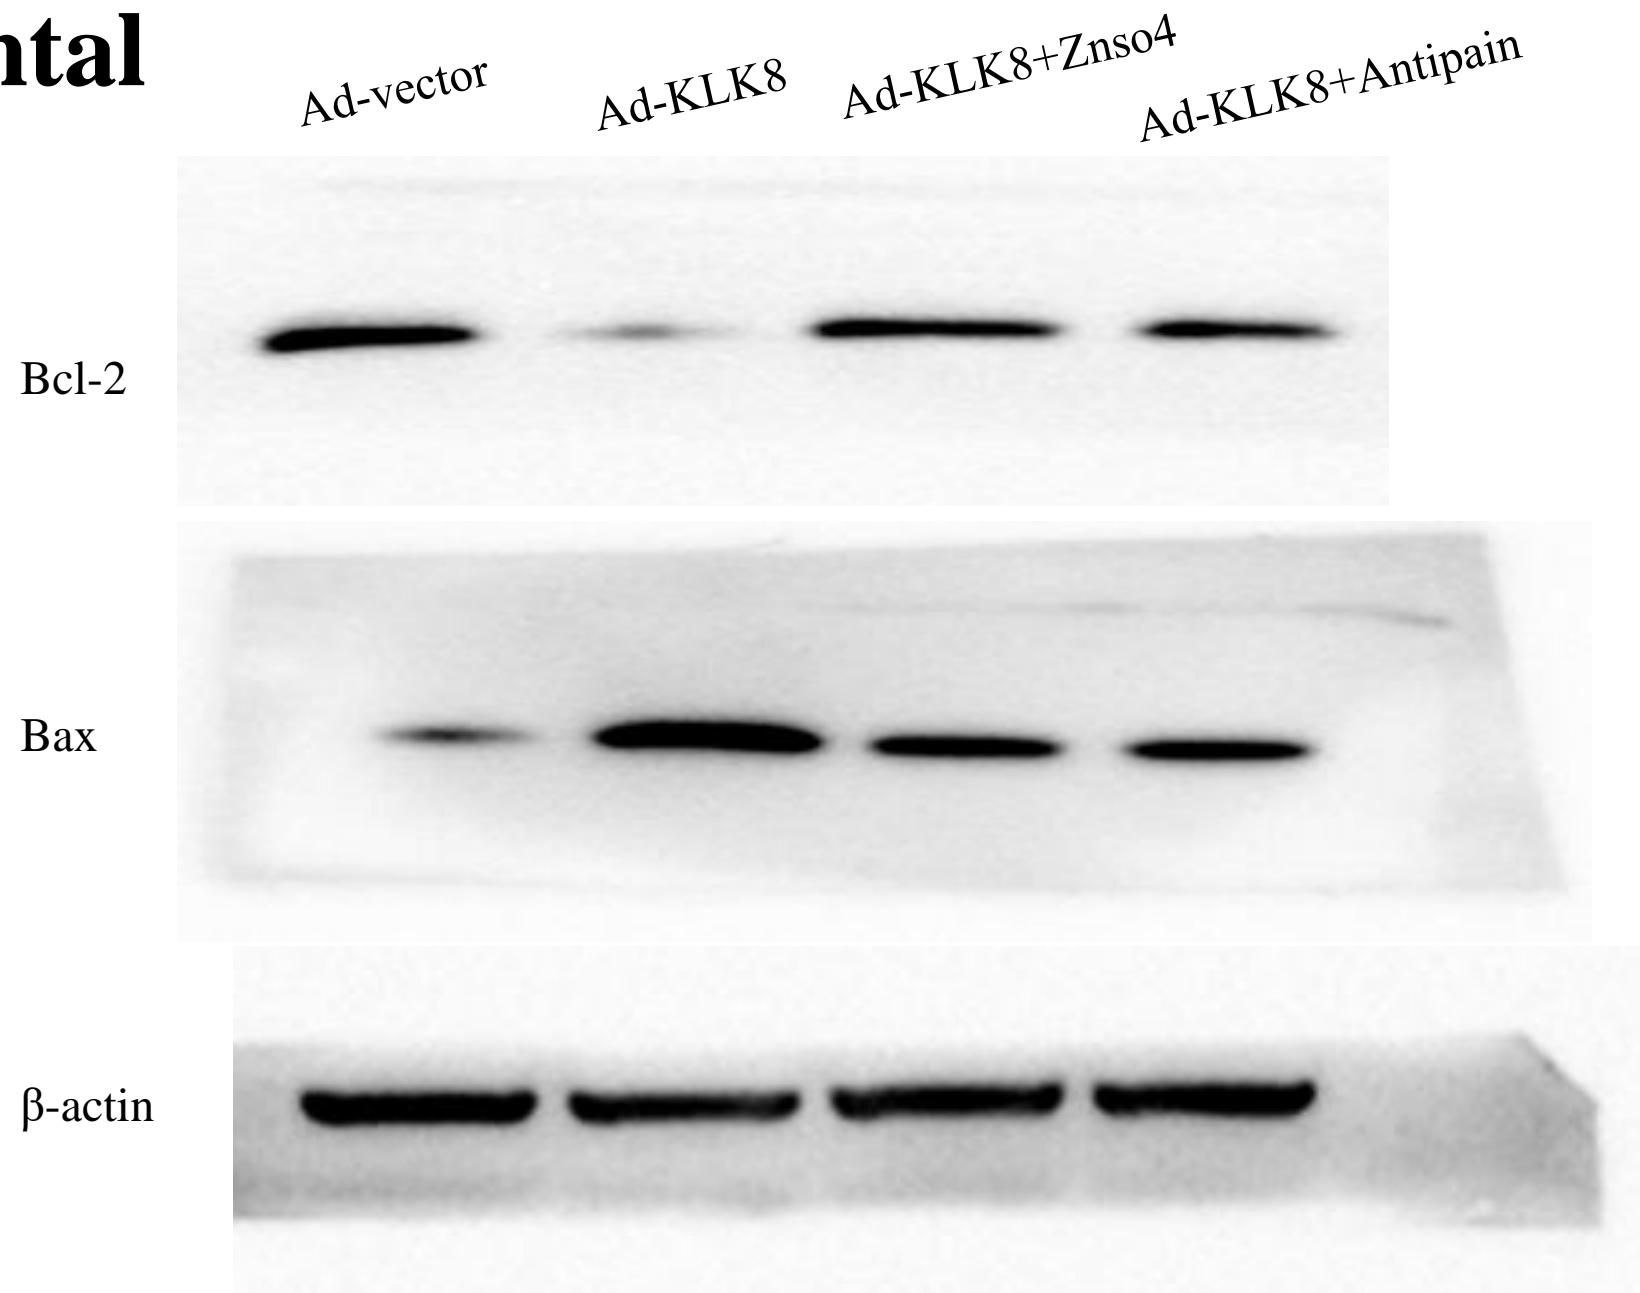

# Supplemental Fig. S7A

|          |   |   |   |   |   |   |
|----------|---|---|---|---|---|---|
| Time (h) | 1 | 3 | 5 | 1 | 3 | 5 |
| rhKLK8   | - | - | - | + | + | + |
| rhNCAM1  | + | + | + | + | + | + |

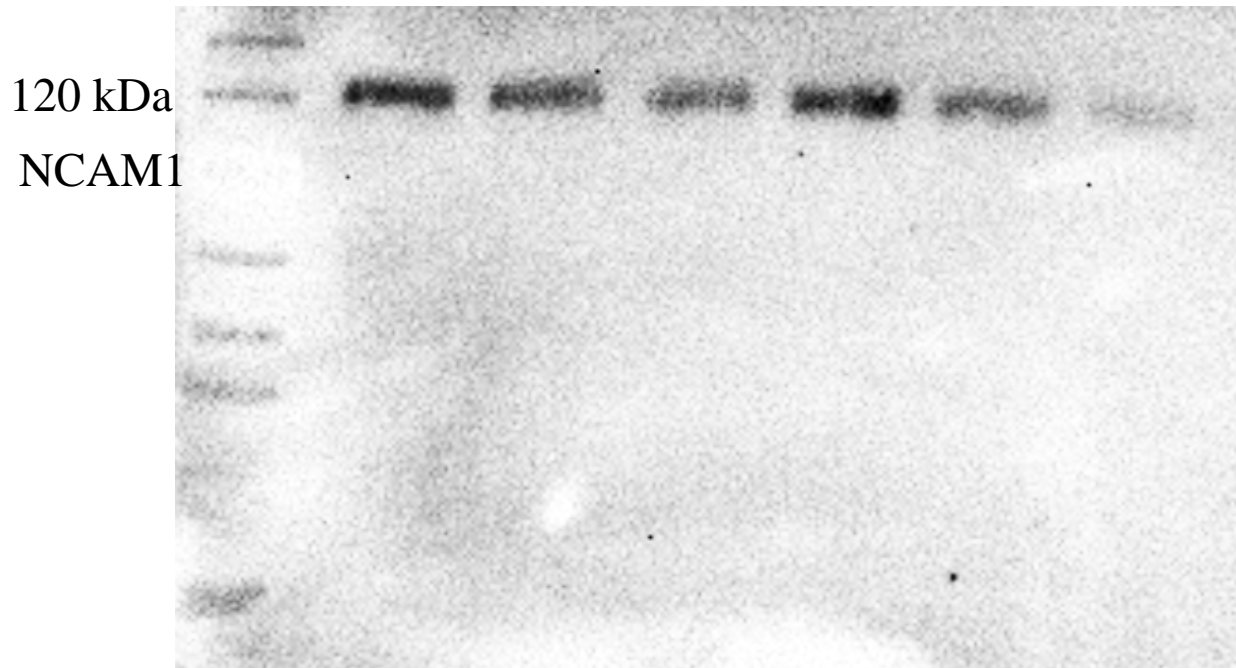

# Supplemental Fig. S7B

|                      |    |   |   |    |
|----------------------|----|---|---|----|
|                      | 3h |   |   |    |
| rhKLK8 (ng/ $\mu$ l) | 0  | 1 | 0 | 10 |
| rhNCAM1              | +  | + | + | +  |

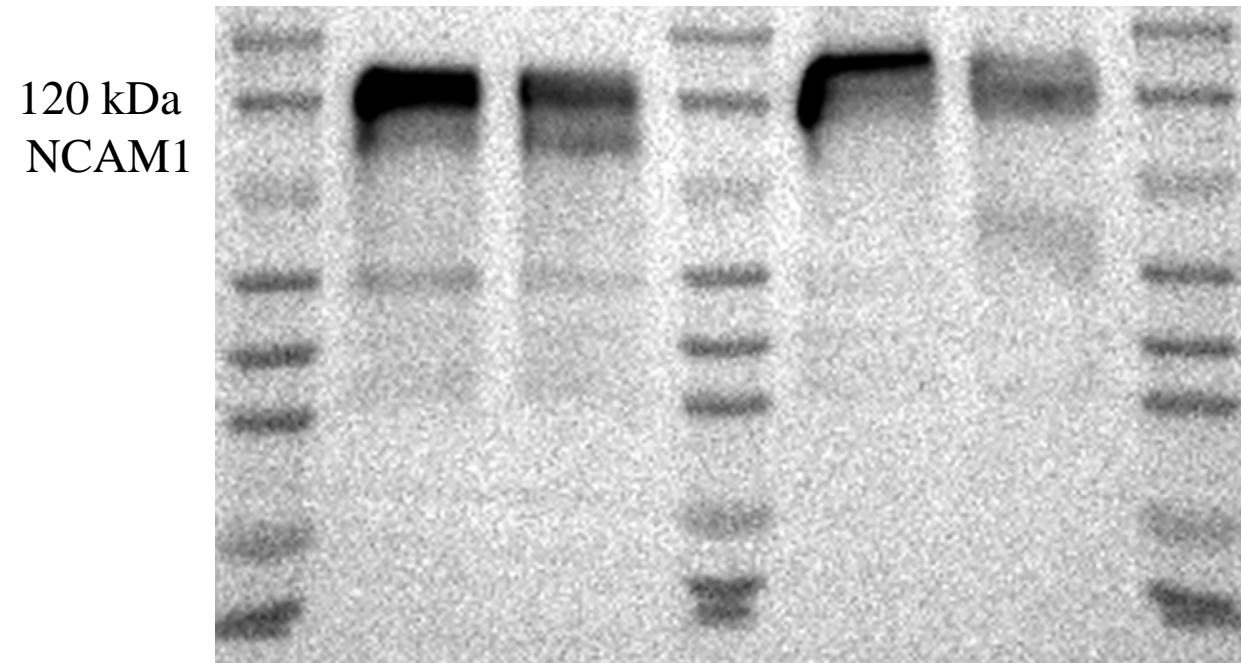

Supplement: 41419_2023_5800_MOESM2_ESM.pdf [file 41419_2023_5800_MOESM2_ESM.pdf]
